# Supplementary material for: Dysregulated Spliceosome Gene Expression May Be a Common Process in Brains of Neurological and Psychiatric Disorders
Source: Research Square preprint supplement (doi:10.21203/rs.3.rs-1184033/v1), 2021-12-22
Supplement: Supplementary file 1 [file 0184ff71f430c30c424d22d5.xlsx]

## Sheet: Online Resource 6
Online Resource 6. GWAS datasets used in this study
Disorder/Trait	Consortium	Dataset	Link	Date	PMID
AD	PGC	AD_sumstats_Jansenetal_2019sept.txt.gz	https://ctg.cncr.nl/documents/p1651/AD_sumstats_Jansenetal_2019sept.txt.gz	2019	30617256
ASD	PGC	iPSYCH-PGC_ASD_Nov2017.gz	https://figshare.com/ndownloader/files/28169292	2019	30804558
BD	PGC	pgc-bip2021-all.vcf.tsv.gz	https://figshare.com/ndownloader/files/26603681	2021	34002096
MDD	PGC	PGC_UKB_depression_genome-wide.txt	https://datashare.ed.ac.uk/bitstream/handle/10283/3203/PGC_UKB_depression_genome-wide.txt?sequence=3&isAllowed=y	2019	30718901
PD	iPDGC	nallsEtAl2019_excluding23andMe_allVariants.tab	https://drive.google.com/u/0/open?id=1FZ9UL99LAqyWnyNBxxlx6qOUlfAnublN	2019	31701892
SCZ	PGC	PGC3_SCZ_wave3_public.v2.tsv.gz	https://figshare.com/ndownloader/files/28169757	2021	Sullivan, Patrick (2021): scz2021. figshare. Dataset. https://doi.org/10.6084/m9.figshare.14672178.v1
