# Supplementary material for: Dysregulated Spliceosome Gene Expression May Be a Common Process in Brains of Neurological and Psychiatric Disorders
Source: Research Square preprint supplement (doi:10.21203/rs.3.rs-1184033/v1), 2021-12-22
Supplement: Supplementary file 2 [file 26841515af80dc859fca093c.xlsx]

## Sheet: Online Resource 1
Online Resource 1. The 255 spliceosome-related genes (SGs)
Gene Symbol (255 genes)
AQR
BCAS2
BUD13
BUD31
C19ORF29
C20ORF14
C9ORF78
C9orf78
CACTIN
CASC3
CCAR1
CCDC12
CD2BP2
CDC40
CDC5L
CDK10
CHERP
CRNKL1
CTNNBL1
CWC15
CWC22
CWC25
CWC27
CXorf56
D6S2654E
DDX23
DDX39B
DDX41
DDX46
DHX15
DHX16
DHX35
DHX38
DHX8
DXS9928E
EFTUD2
EIF4A3
ESS2
FAM32A
FAM50A
FLJ22965
FLJ35382
FNBP3
FRA10AC1
FRG1
G10
GPATCH1
GPKOW
HNRNPA0
HNRNPA1
HNRNPA1L2
HNRNPA1P10
HNRNPA1P14
HNRNPA1P15
HNRNPA1P16
HNRNPA1P2
HNRNPA1P25
HNRNPA1P33
HNRNPA1P35
HNRNPA1P36
HNRNPA1P48
HNRNPA1P49
HNRNPA1P50
HNRNPA1P54
HNRNPA1P59
HNRNPA1P62
HNRNPA1P68
HNRNPA1P7
HNRNPA1P76
HNRNPA2B1
HNRNPA3
HNRNPA3P10
HNRNPA3P11
HNRNPA3P12
HNRNPA3P2
HNRNPA3P6
HNRNPA3P7
HNRNPA3P9
HNRNPAB
HNRNPC
HNRNPCP1
HNRNPCP2
HNRNPCP7
HNRNPD
HNRNPDL
HNRNPF
HNRNPH1
HNRNPH1P1
HNRNPH2
HNRNPH3
HNRNPK
HNRNPL
HNRNPLL
HNRNPLP2
HNRNPM
HNRNPMP1
HNRNPR
HNRNPRP1
HNRNPU
HNRNPUL1
HNRNPUL2
HNRNPUL2-BSCL2
HPRP8BP
HSPA8
HTATSF1
IK
ISY1
KIAA0073
KIAA1160
KIAA1604
LENG1
LSM1
LSM10
LSM11
LSM12
LSM14A
LSM14B
LSM2
LSM3
LSM4
LSM5
LSM6
LSM7
LSM8
MAGOH
MAGOHB
MFAP1
MGC20398
MGC23918
MORG1
NAA38
NHP2L1
NOSIP
P14
P29
PDCD7
PHF5A
PLRG1
PPIE
PPIG
PPIH
PPIL1
PPIL2
PPIL3
PPWD1
PQBP1
PRCC
PRPF18
PRPF19
PRPF3
PRPF31
PRPF38A
PRPF4
PRPF40A
PRPF4B
PRPF6
PRPF8
PUF60
RBM10
RBM17
RBM22
RBM25
RBM5
RBM8A
RNF113A
RNPC3
RNU1-1
RNU11
RNU12
RNU2-1
RNU4-1
RNU4ATAC
RNU5A-1
RNU6-1
RNU6ATAC
RPL36A-HNRNPH2
RY1
SAP18
SART1
SDCCAG10
SDE2
SF1
SF3A1
SF3A2
SF3A3
SF3B1
SF3B2
SF3B3
SF3B4
SF3B5
SF3B6
SIAHBP1
SKIIP
SLU7
SMNDC1
SMU1
SNIP1
SNRNP200
SNRNP25
SNRNP35
SNRNP40
SNRNP48
SNRNP70
SNRP70
SNRPA
SNRPA1
SNRPB
SNRPB2
SNRPC
SNRPD1
SNRPD2
SNRPD3
SNRPE
SNRPF
SNRPG
SNRPN
SNU13
SNW1
SR140
SRRM2
SRSF1
SRSF10
SRSF11
SRSF12
SRSF2
SRSF3
SRSF4
SRSF5
SRSF6
SRSF7
SRSF8
SRSF9
SRSF9P1
SUGP1
SYF2
TFIP11
THRAP3
TXNL4
TXNL4A
U2AF1
U2AF2
U2SURP
U5-116KD
U5-200KD
USP39
WBP11
WBP4
WDR83
XAB2
YBX1
ZCRB1
ZMAT2
ZMAT5
ZNF830
ZRSR2
