# Supplementary material for: Dysregulated Spliceosome Gene Expression May Be a Common Process in Brains of Neurological and Psychiatric Disorders
Source: Research Square preprint supplement (doi:10.21203/rs.3.rs-1184033/v1), 2021-12-22
Supplement: Supplementary file 3 [file 4737d0275d395ed122622cc0.xlsx]

## Sheet: Online Resource 3
Online Resource 3. Summary of the significantly differentially expressed genes out of the 255 spliceosome-related genes in various brain regions and disorders
Disorder	Brain region	No. of sigDEGs
AD	FrontalCortex	4
AD	PostCentralGyrus	0
AD	SuperiorFrontalGyrus	0
AD	Neocortex	9
AD	TemporalCortex	0
AD	EntorhinalCortex	1
AD	Hippocampus	17
ASD	Cerebellum	52
ASD	FrontalCortex	12
ASD	OccipitalCortex	1
ASD	TemporalCortex	13
BD	Hippocampus	0
BD	Cerebellum	1
BD	FrontalCortex	47
BD	Striatum	0
BD	ParietalCortex	0
MDD	AnteriorCingulateCortex	3
MDD	ParietalCortex	0
MDD	Hippocampus	0
MDD	Cerebellum	1
MDD	FrontalCortex	20
MDD	Striatum	0
PD	SubstantiaNigra	25
PD	Medulla	4
PD	SuperiorFrontalGyrus	0
PD	Cerebellum	7
PD	FrontalCortex	4
PD	Striatum	24
SCZ	Striatum	4
SCZ	ParietalCortex	1
SCZ	Hippocampus	6
SCZ	Cerebellum	0
SCZ	FrontalCortex	22
SCZ	TemporalCortex	32
