# Supplementary material for: Dysregulated Spliceosome Gene Expression May Be a Common Process in Brains of Neurological and Psychiatric Disorders
Source: Research Square preprint supplement (doi:10.21203/rs.3.rs-1184033/v1), 2021-12-22
Supplement: Supplementary file 4 [file 54b68302f89abdabdafc6642.xlsx]

## Sheet: DEG summary statistics
Online Resource 2. DEG summary statistics of the 138 sig.dSGs in the BrainEXP-NPD database
Mega data		AD hipp				AD front ctx				AD neocortex				AD entorhinalcortex				ASD cerebellum				ASD frontal cortex				ASD temporal cortex				ASD occipital cortex				BD frontal cortex				BD cerebellum				MDD anterior cingulate cortex				MDD frontal cortex
Gene.Symbol		logFC	AveExpr	P.Value	adj.P.Val	logFC	AveExpr	P.Value	adj.P.Val	logFC	AveExpr	P.Value	adj.P.Val	logFC	AveExpr	P.Value	adj.P.Val	logFC	AveExpr	P.Value	adj.P.Val	logFC	AveExpr	P.Value	adj.P.Val	logFC	AveExpr	P.Value	adj.P.Val	logFC	AveExpr	P.Value	adj.P.Val	logFC	AveExpr	P.Value	adj.P.Val	logFC	AveExpr	P.Value	adj.P.Val	logFC	AveExpr	P.Value	adj.P.Val	logFC	AveExpr	P.Value	adj.P.Val
AQR																		0.116379	8.08028	0.000818015	0.00686235
BCAS2																		-0.128721	7.71239	0.00260655	0.0167126	-0.115634	8.51452	0.00153701	0.0456545
BUD13
BUD31																		-0.167403	11.0278	2.8e-05	0.000560058
C9orf78
CASC3		0.103189	10.0285	2.08e-06	0.000265718													0.117122	9.41338	0.0011925	0.00917837													-0.0409893	8.48944	0.000447445	0.00501557
CCDC12																		-0.137483	9.95257	2.45e-06	0.000102511
CD2BP2		-0.0758371	9.58152	1.9e-05	0.00113868
CDC40
CDC5L		-0.0611616	8.9881	0.00271622	0.0313206																													0.0401532	7.60987	3.98e-05	0.000829973
CDK10		-0.083416	9.49375	0.000156105	0.00484747													-0.206016	9.27813	4.35e-06	0.000148453
CHERP																		0.208292	8.09236	9.17e-07	5.16e-05
CXorf56																										0.12284	8.66329	0.00168548	0.0457072
DDX23
DDX39B																																														0.0594777	5.60278	0.00131588	0.0177576
DDX41																		-0.0925071	8.66649	0.00244198	0.0159193					-0.1791	10.177	1.77e-06	0.00156962					-0.0285182	8.71762	0.00535314	0.0300338
DHX15																																		-0.0288293	9.80132	0.00446659	0.0265551
DHX16																																		-0.0312782	7.7471	0.00836462	0.0416252
DHX8																		0.0996697	7.31398	0.000758553	0.00646157																									-0.0407818	7.03565	0.00202119	0.0239792
EFTUD2																		0.131868	9.07383	3.17e-05	0.000603621
FAM32A																																														-0.0329032	9.08091	0.00199301	0.0237299
FAM50A																		-0.0823141	10.5775	0.0103138	0.0475514													-0.0763236	8.18489	6.11e-07	3.82e-05									-0.0489611	8.38334	0.00205424	0.0240696
FRG1																		-0.18374	10.4232	4.37e-05	0.00076074	-0.115872	11.4706	0.00193919	0.049449
GPATCH1
GPKOW																																		-0.0368561	7.75465	0.00221459	0.016081
HNRNPA1
HNRNPA1L2																										-0.137311	8.62702	0.000823619	0.0309926
HNRNPA1P7
HNRNPA2B1																																		-0.0678094	9.98835	1.2e-07	1.1e-05
HNRNPA3
HNRNPAB		0.0731993	10.1836	0.00216879	0.0269387													-0.105579	11.1463	0.00393075	0.0228057													-0.0504475	7.8969	7.83e-05	0.0013679									-0.047271	9.35993	0.000212831	0.00559611
HNRNPCP2						-0.0511806	12.258	0.000467145	0.030974																									-0.0260503	9.47844	0.00424412	0.0255534
HNRNPD
HNRNPF
HNRNPH1
HNRNPH2
HNRNPH3										0.408286	7.17274	1.51e-05	0.00257761
HNRNPL																																		-0.0485665	8.23229	0.0020338	0.0152013
HNRNPUL1																																		-0.0381302	6.75806	0.000141414	0.00212234
HNRNPUL2																		0.241278	10.6189	3.57e-05	0.000655766
HTATSF1
IK																																		-0.0446298	8.88203	5.25e-05	0.00100682
LSM1																		-0.117901	11.42	0.00030543	0.00319687													-0.043042	8.7947	3.73e-05	0.000785846									-0.0448872	9.24614	0.000427973	0.00853384
LSM10																		-0.187189	8.96071	3.53e-05	0.000649987
LSM11																		0.138183	7.50695	0.000126516	0.00167024
LSM12
LSM14A
LSM14B																																		0.0367524	6.7121	0.00859824	0.0425728
LSM2		0.0678039	9.50941	0.00155577	0.0216398													-0.244751	11.0611	6.16e-08	9.42e-06									-0.500092	9.34805	1.73e-06	0.027261													-0.057012	6.97623	8.56e-05	0.00312779
LSM3																		-0.169498	11.0674	0.00275196	0.0174283													-0.0311385	8.79744	0.00513424	0.0292013
LSM4																		-0.182115	10.2988	0.000358849	0.00361209																					0.0433194	9.72082	0.00209115	0.0491801
LSM5																		-0.0950709	8.92478	0.00758364	0.0377577													-0.0468981	6.50035	0.00090213	0.00843091									-0.0450032	7.01743	0.00260524	0.0283453
LSM6																		-0.142639	8.23369	0.00149392	0.0109123
LSM7																		-0.201018	10.5379	6.06e-05	0.000960489													-0.0553358	7.24568	0.00324964	0.0210377
MAGOH																		-0.110124	8.361	0.00224481	0.0149366													-0.0510856	5.78491	0.000943435	0.0086943
MFAP1																																		-0.042655	8.30703	0.000703391	0.00706615
NAA38
NHP2L1																						-0.138041	13.2017	0.000929399	0.0366088	-0.156581	13.3336	0.000611615	0.0271135
NOSIP																		-0.170471	10.6938	0.00013507	0.00173805
PHF5A																		-0.156614	10.1355	1.18e-05	0.000302356
PLRG1		-0.0763401	9.2133	0.00196323	0.0252267					-0.27345	5.81316	0.000772881	0.0171137
PPIE
PPIG																										0.149122	8.08801	0.000910331	0.0326764																	0.0616149	7.46106	0.00540404	0.0458772
PPIH																		-0.275822	9.13794	8.08e-08	1.09e-05
PPIL1																		-0.278579	8.66115	2.2e-05	0.000477956
PPIL2
PPIL3		0.106787	9.81577	0.00321711	0.0350149													-0.139927	10.5669	0.00892565	0.0426866
PPWD1																		-0.0709687	8.0418	0.00493243	0.0273094																					-0.0611226	7.09351	0.00061499	0.0262885
PQBP1																		-0.323701	9.58155	8.35e-09	2.69e-06					-0.186706	10.7123	3.2e-05	0.00677081
PRCC																																		-0.0571604	6.64039	1.53e-05	0.00040882
PRPF19																		0.109241	9.77899	0.00979232	0.0457217					-0.183299	11.4313	5.93e-05	0.00927694
PRPF3										0.161646	5.63854	0.00209738	0.0299596					-0.148757	9.62433	0.000169967	0.00203586
PRPF31																																		0.0407305	7.60975	0.000409848	0.00471537
PRPF38A		0.0861382	8.79093	3.85e-06	0.000386328
PRPF4																		-0.0773232	9.44387	0.00848221	0.0410642	-0.153657	10.841	9.89e-05	0.0118222	-0.131143	10.9952	0.000207509	0.016384
PRPF40A																																		0.100783	7.26448	2.7e-10	9.41e-08									0.047249	7.42043	0.00136475	0.0182499
PRPF4B																																		-0.037805	7.44454	0.00293771	0.0196619									-0.0552088	8.27049	0.000230727	0.0058687
PRPF6																																		-0.0343181	8.5317	0.000484075	0.00531921
PRPF8						0.0649856	12.0969	0.00109435	0.0467889									0.170658	11.1305	0.00338076	0.0203401													0.0392401	9.25772	3.24e-05	0.000719997	0.10054	11.4118	3.91928	0.000177653
PUF60																										-0.104211	12.6246	0.00194317	0.0498072					-0.0374177	9.19436	3.21e-05	0.000715753
RBM10		-0.106484	10.183	4.58e-07	9.74e-05													0.152667	11.5835	0.00818535	0.039946	0.121078	12.7146	0.00179999	0.0483249									-0.0379049	8.19807	0.0011114	0.00986486
RBM17		0.107186	10.308	2.34e-07	6.5e-05																					0.143584	12.5082	0.000159062	0.0148162
RBM22																																		-0.049991	6.2714	5.72e-05	0.00107442									-0.0401573	7.38387	0.00209232	0.0244039
RBM25																																										-0.0532127	9.43699	0.00166895	0.043708
RBM5		-0.091361	10.4045	9.38e-05	0.00345974													-0.0838516	10.422	0.0078525	0.0387779
RNF113A																						-0.147299	9.81859	0.00180634	0.0483249
RNPC3																		-0.105516	8.19202	0.00173779	0.0122636
SART1																						0.148436	8.48663	0.000824695	0.0343134									-0.0725888	6.98791	1.17e-09	2.98e-07
SF1																		-0.209309	8.28102	0.000855966	0.00709369					-0.3418	10.1395	6.6e-05	0.0094198
SF3A1		-0.0540412	8.93281	0.00346365	0.0367292																	-0.149853	9.91737	0.000263627	0.0194271									0.0539997	8.03029	1.57e-07	1.34e-05
SF3A3										-0.312231	3.9512	7.51e-05	0.00550959
SF3B1																										-0.135296	11.5662	0.00078118	0.0306466																	-0.0323902	10.7956	0.00479227	0.0425927
SF3B3
SF3B4																																														-0.0710171	8.67661	9.21e-07	0.000179581
SF3B5		-0.0676494	9.90129	0.00275392	0.031726					-0.301838	7.41409	0.00055845	0.0143228					-0.19634	10.049	0.000134769	0.00173559													-0.039503	8.62427	0.000282194	0.00355141									-0.0405618	9.47146	0.00176876	0.0218635
SMNDC1																																		-0.0411063	7.10864	0.0030663	0.0202443
SMU1
SNIP1																																		0.0379103	5.57454	0.00649116	0.0343396
SNRNP200																		0.179328	9.19078	1.92e-05	0.000432087
SNRNP25																																														-0.0472924	9.85861	0.00364482	0.0357257
SNRNP35																																		-0.0469023	6.97927	0.000373433	0.0044503
SNRNP40										0.444786	2.45428	0.00132763	0.0232487					-0.178373	9.33313	8.97e-07	5.1e-05
SNRNP70																		-0.168188	11.328	0.00288359	0.0179873													0.0437356	8.89692	0.000390456	0.00457096
SNRPA
SNRPA1																		-0.226977	10.9178	2.57e-07	2.24e-05
SNRPB						0.0778952	9.11917	0.00104608	0.0458318									-0.320806	10.8911	6.75e-07	4.34e-05					-0.193509	12.2148	3.7e-05	0.00708212					0.050992	8.32312	3.61e-05	0.000766953
SNRPB2																		-0.227	10.7213	1.19e-07	1.42e-05																									-0.0370227	9.12929	0.00315855	0.032369
SNRPC																		-0.185099	9.76648	1.51e-06	7.15e-05													0.0357597	8.24575	0.00055306	0.0058916
SNRPD1														-0.162576	8.06216	2.83e-06	0.031958	-0.176693	8.24522	1.52e-06	7.16e-05																									-0.0505132	8.14109	0.00168502	0.0211057
SNRPD2																		-0.152708	12.8229	1.18e-05	0.000301961
SNRPD3																						0.157293	9.50859	0.000101317	0.0118895
SNRPE																																		-0.0516497	7.66966	0.000244082	0.00315261
SNRPF																		-0.202421	10.7466	8.96e-06	0.000243628													-0.0500185	6.87116	0.000393611	0.00459167
SNW1		0.0452444	8.60955	0.00220943	0.0273714																													-0.0330359	7.71451	0.000725097	0.00719236
SRRM2
SRSF1																																		-0.0360003	7.73664	0.00495364	0.0285221
SRSF11
SRSF12										-0.239512	3.87783	0.000769715	0.0171137
SRSF2
SRSF3																																														-0.0532676	10.2203	9.33e-06	0.000713503
SRSF4
SRSF5										0.21789	7.90484	0.00237536	0.0324962
SRSF8
SRSF9																																		-0.0321856	9.14707	0.0018654	0.0143974
SUGP1																																		0.0311145	7.64711	0.00163019	0.0130691
SYF2		0.0612089	9.71163	0.00039683	0.00912193
TFIP11																																		0.0311924	7.297	0.00550041	0.0305881
THRAP3																																														0.0431929	7.54493	0.00401119	0.0379146
TXNL4A		0.0576427	8.7866	0.00141487	0.0205424																													-0.045772	9.89366	1.93e-05	0.000489002
U2AF2
U2SURP
WBP11																		0.111883	10.3094	0.00067272	0.00589116
WBP4
XAB2																		0.122444	10.1357	0.00159631	0.0115108
YBX1										0.957124	3.11635	0.00449859	0.0457237									0.138738	11.3076	0.000971703	0.0371178									-0.0358901	9.14686	0.00193296	0.0147385
ZCRB1																						-0.125099	10.4729	0.000262562	0.0194271
ZMAT5																						0.0935477	8.96401	0.00184207	0.0483249
ZRSR2						0.095256	8.3258	0.000255126	0.0239645
		unique to one condition
		common to 2 conditions
		common to 3 conditions
		common to 4 or more conditions
[truncated: 44 more columns]

## Sheet: DEG Overlap conditions
DEG overlap conditions of the 138 sig.dSGs among the six disorders
Mega data
Gene.Symbol		conditions
BCAS2		ASD
C9orf78		PD
CCDC12		ASD
CD2BP2		AD
CDC40		PD
CXorf56		ASD
DDX39B		MDD
DHX16		BD
FAM32A		MDD
GPATCH1		SCZ
HNRNPA1		SCZ
HNRNPA1L2		ASD
HNRNPA1P7		SCZ
HNRNPA2B1		BD
HNRNPA3		SCZ
HNRNPD		SCZ
HNRNPF		PD
HNRNPH1		SCZ
HNRNPH2		PD
HNRNPUL1		BD
HTATSF1		PD
IK		BD
LSM10		ASD
LSM14A		SCZ
NAA38		SCZ
NHP2L1		ASD
PHF5A		ASD
PLRG1		AD
PPIL1		ASD
PPIL2		SCZ
PRPF19		ASD
PRPF38A		AD
PRPF6		BD
RNF113A		ASD
SF3B4		MDD
SNRNP25		MDD
SNRPA1		ASD
SNRPE		BD
SRRM2		SCZ
SRSF1		BD
SRSF11		SCZ
SRSF4		SCZ
SRSF8		SCZ
SRSF9		BD
SUGP1		BD
U2AF2		SCZ
U2SURP		PD
WBP4		PD
AQR		ASD, PD
BUD13		MDD, SCZ
BUD31		ASD, SCZ
CDC5L		AD,BD
CHERP		ASD, PD
DDX23		PD, SCZ
DDX41		ASD, PD
DHX15		BD, PD
FRG1		ASD, PD
GPKOW		BD, PD
HNRNPCP2		AD, BD
HNRNPH3		AD,SCZ
LSM11		ASD, PD
LSM12		PD, SCZ
LSM14B		PD, BD
LSM4		MDD, ASD
MAGOH		ASD, BD
MFAP1		BD, SCZ
NOSIP		ASD, PD
PPIE		PD, SCZ
PPIH		ASD, PD
PPIL3		AD, ASD
PQBP1		ASD, PD
PRCC		BD, SCZ
PRPF31		PD, SCZ
PRPF4		ASD, PD
PRPF4B		BD, MDD
RBM17		AD, ASD
RNPC3		ASD, PD
SF1		ASD, PD
SF3A3		AD, SCZ
SF3B1		ASD, MDD
SF3B3		PD, SCZ
SMNDC1		BD, SCZ
SMU1		PD, SCZ
SNIP1		BD, SCZ
SNRNP200		ASD, PD
SNRNP35		BD, SCZ
SNRPA		PD, SCZ
SNRPD2		ASD, SCZ
SNRPD3		ASD, PD
SNW1		AD, BD
SRSF12		AD, SCZ
SRSF2		PD, SCZ
SRSF3		MDD, SCZ
SRSF5		AD, SCZ
SYF2		AD, SCZ
TFIP11		BD, SCZ
TXNL4A		AD, BD
WBP11		ASD, SCZ
XAB2		ASD, PD
ZCRB1		ASD, SCZ
ZMAT5		ASD, PD
EFTUD2		ASD, SCZ
HNRNPUL2		ASD, SCZ
CASC3		AD, ASD, BD
CDK10		AD, ASD, SCZ
DHX8		ASD, MDD, SCZ
HNRNPL		BD, PD, SCZ
LSM1		ASD, BD, MDD
LSM2		AD, ASD, MDD
LSM3		ASD, BD, PD
LSM6		ASD, PD, SCZ
PPIG		ASD, MDD, PD
PRPF3		AD, ASD, PD
PRPF40A		BD, MDD, SCZ
PRPF8		AD, ASD, BD
PUF60		ASD, BD, PD
RBM10		AD, ASD, BD
RBM22		BD, MDD, PD
RBM25		MDD, PD, SCZ
RBM5		AD, ASD, PD
SART1		ASD, BD, PD
SNRNP40		AD, ASD, SCZ
SNRNP70		ASD, BD, SCZ
SNRPB2		ASD, MDD, PD
SNRPC		ASD, BD, SCZ
SNRPF		ASD, BD, PD
THRAP3		MDD, PD, SCZ
ZRSR2		AD, PD, SCZ
FAM50A		ASD, BD, MDD,PD
HNRNPAB		AD, ASD, BD, MDD
LSM5		ASD, BD, MDD, PD
LSM7		ASD, BD, PD, SCZ
PPWD1		ASD, MDD, PD, SCZ
SF3A1		AD, ASD, BD, SCZ
SF3B5		AD, ASD, BD, MDD
SNRPB		AD, ASD, BD, PD
SNRPD1		AD, ASD, MDD, PD
YBX1		AD, ASD, BD, PD
		unique to one condition
		common to 2 conditions
		common to 3 conditions
		common to 4 or more conditions
