# Supplementary material for: Dysregulated Spliceosome Gene Expression May Be a Common Process in Brains of Neurological and Psychiatric Disorders
Source: Research Square preprint supplement (doi:10.21203/rs.3.rs-1184033/v1), 2021-12-22
Supplement: Supplementary file 5 [file e50f0915f73bcb97f4451bdb.xlsx]

## Sheet: Online Resource 4
Online Resource 4. Microarray&RNAseq_138&116dSGs
Gene.Symbol	region	platform	logFC	AveExpr	P.Value	adj.P.Val
AQR	ASD_Cerebellum	Microarray	0.116379	8.08028	0.000818015	0.00686235
AQR	PD_Cerebellum	Microarray	0.130776	8.10558	0.00150865	0.0375176
BCAS2	ASD_Cerebellum	Microarray	-0.128721	7.71239	0.00260655	0.0167126
BCAS2	ASD_FrontalCortex	Microarray	-0.115634	8.51452	0.00153701	0.0456545
BCAS2	PD_SubstantiaNigra	RNAseq	-0.288992	5.17014	0.000306253	0.0444671
BCAS2	SCZ_FrontalCortex	RNAseq	-0.0366788	5.12176	0.00680022	0.0216705
BUD13	SCZ_TemporalCortex	Microarray	0.116498	5.86688	0.00128829	0.0133902
BUD13	MDD_Cerebellum	Microarray	-0.0939089	7.81209	0.000223387	0.0464803
BUD13	ASD_TemporalCortex	RNAseq	-0.138966	3.70379	0.000282005	0.00256928
BUD13	SCZ_FrontalCortex	RNAseq	-0.0535047	2.81204	0.0033594	0.0121676
BUD31	ASD_Cerebellum	Microarray	-0.167403	11.0278	2.8e-05	0.000560058
BUD31	SCZ_FrontalCortex	Microarray	-0.0294607	8.33991	0.00796835	0.0487659
BUD31	SCZ_FrontalCortex	RNAseq	-0.0613843	4.44976	0.000341067	0.0018314
C9orf78	PD_SubstantiaNigra	Microarray	0.100535	6.96775	0.000355092	0.0045163
C9orf78	AD_TemporalCortex	RNAseq	0.123545	5.87937	0.0135326	0.0482845
C9orf78	PD_FrontalCortex	RNAseq	0.0979797	5.67743	0.00047941	0.00266768
CASC3	AD_Hippocampus	Microarray	0.103189	10.0285	2.08e-06	0.000265718
CASC3	ASD_Cerebellum	Microarray	0.117122	9.41338	0.0011925	0.00917837
CASC3	BD_FrontalCortex	Microarray	-0.0409893	8.48944	0.000447445	0.00501557
CASC3	AD_TemporalCortex	RNAseq	0.372547	7.06529	4.21e-05	0.000766314
CASC3	PD_FrontalCortex	RNAseq	0.156181	6.47032	7.82e-05	0.000640882
CCDC12	ASD_Cerebellum	Microarray	-0.137483	9.95257	2.45e-06	0.000102511
CCDC12	PD_FrontalCortex	RNAseq	0.107964	3.79219	0.000809019	0.00404993
CD2BP2	AD_Hippocampus	Microarray	-0.0758371	9.58152	1.9e-05	0.00113868
CD2BP2	PD_FrontalCortex	RNAseq	0.115351	5.93274	2.24e-05	0.000245575
CD2BP2	SCZ_FrontalCortex	RNAseq	-0.0570986	5.89101	1.03e-05	0.000101937
CD2BP2	SCZ_Hippocampus	RNAseq	-0.839731	7.62326	6.46e-05	0.00688779
CDC40	PD_Striatum	Microarray	0.119872	10.1799	0.00600549	0.0472932
CDC5L	AD_Hippocampus	Microarray	-0.0611616	8.9881	0.00271622	0.0313206
CDC5L	BD_FrontalCortex	Microarray	0.0401532	7.60987	3.98e-05	0.000829973
CDC5L	BD_Striatum	RNAseq	-0.177313	6.35995	0.000364092	0.0330486
CDK10	AD_Hippocampus	Microarray	-0.083416	9.49375	0.000156105	0.00484747
CDK10	ASD_Cerebellum	Microarray	-0.206016	9.27813	4.35e-06	0.000148453
CDK10	SCZ_FrontalCortex	Microarray	0.0334413	7.07339	0.00159523	0.0158361
CDK10	ASD_TemporalCortex	RNAseq	0.151681	4.02967	0.00031391	0.00280716
CDK10	PD_FrontalCortex	RNAseq	0.223759	6.14084	8.48e-05	0.000683792
CHERP	ASD_Cerebellum	Microarray	0.208292	8.09236	9.17e-07	5.16e-05
CHERP	PD_SubstantiaNigra	Microarray	-0.1044	6.866	0.00177463	0.0141843
CHERP	PD_FrontalCortex	RNAseq	0.173308	4.68122	7.12e-08	3.14e-06
CHERP	SCZ_FrontalCortex	RNAseq	0.144452	4.1817	5.41e-14	1.4e-11
CXorf56	ASD_TemporalCortex	Microarray	0.12284	8.66329	0.00168548	0.0457072
CXorf56	AD_TemporalCortex	RNAseq	-0.259412	3.3909	6.84e-05	0.00106703
DDX23	PD_SubstantiaNigra	Microarray	0.0722822	7.41698	0.00116664	0.0105362
DDX23	SCZ_FrontalCortex	Microarray	-0.028166	7.60606	0.0024448	0.021642
DDX23	SCZ_Striatum	Microarray	-0.117715	7.17187	0.000496084	0.0223346
DDX23	PD_FrontalCortex	RNAseq	0.180633	4.89138	4.43e-06	6.87e-05
DDX39B	MDD_FrontalCortex	Microarray	0.0594777	5.60278	0.00131588	0.0177576
DDX39B	PD_FrontalCortex	RNAseq	0.115442	6.22291	0.00108315	0.00513482
DDX41	ASD_Cerebellum	Microarray	-0.0925071	8.66649	0.00244198	0.0159193
DDX41	ASD_TemporalCortex	Microarray	-0.1791	10.177	1.77e-06	0.00156962
DDX41	BD_FrontalCortex	Microarray	-0.0285182	8.71762	0.00535314	0.0300338
DDX41	SCZ_FrontalCortex	RNAseq	0.0293938	5.06173	0.0108611	0.0317312
DHX15	PD_Striatum	Microarray	0.0728157	9.8366	0.00563308	0.0454502
DHX15	PD_SubstantiaNigra	Microarray	0.0628124	8.98949	0.00401291	0.0252956
DHX15	BD_FrontalCortex	Microarray	-0.0288293	9.80132	0.00446659	0.0265551
DHX15	PD_FrontalCortex	RNAseq	0.127889	5.02495	1.45e-06	2.94e-05
DHX16	BD_FrontalCortex	Microarray	-0.0312782	7.7471	0.00836462	0.0416252
DHX16	ASD_TemporalCortex	RNAseq	-0.081995	4.08791	0.00635725	0.0255786
DHX16	PD_FrontalCortex	RNAseq	0.109024	3.95376	0.00184127	0.00785204
DHX8	ASD_Cerebellum	Microarray	0.0996697	7.31398	0.000758553	0.00646157
DHX8	SCZ_TemporalCortex	Microarray	-0.0818419	7.18116	0.00290664	0.0231115
DHX8	MDD_FrontalCortex	Microarray	-0.0407818	7.03565	0.00202119	0.0239792
DHX8	AD_TemporalCortex	RNAseq	-0.151584	5.7198	1.8e-05	0.000431958
EFTUD2	ASD_Cerebellum	Microarray	0.131868	9.07383	3.17e-05	0.000603621
EFTUD2	SCZ_TemporalCortex	Microarray	-0.0790833	8.44368	0.00108135	0.0119043
EFTUD2	ASD_TemporalCortex	RNAseq	0.106071	5.09884	0.00164211	0.00927906
EFTUD2	SCZ_FrontalCortex	RNAseq	0.0289855	5.77777	0.00396432	0.0139708
FAM32A	MDD_FrontalCortex	Microarray	-0.0329032	9.08091	0.00199301	0.0237299
FAM32A	PD_FrontalCortex	RNAseq	0.0753036	5.41348	0.0136233	0.038389
FAM32A	SCZ_FrontalCortex	RNAseq	-0.0540495	5.19821	1.24e-06	1.73e-05
FAM50A	ASD_Cerebellum	Microarray	-0.0823141	10.5775	0.0103138	0.0475514
FAM50A	PD_SubstantiaNigra	Microarray	-0.0769858	7.50773	5.37e-05	0.0011949
FAM50A	BD_FrontalCortex	Microarray	-0.0763236	8.18489	6.11e-07	3.82e-05
FAM50A	MDD_FrontalCortex	Microarray	-0.0489611	8.38334	0.00205424	0.0240696
FAM50A	PD_FrontalCortex	RNAseq	0.163992	5.79322	3.28e-05	0.00033042
FRG1	ASD_Cerebellum	Microarray	-0.18374	10.4232	4.37e-05	0.00076074
FRG1	ASD_FrontalCortex	Microarray	-0.115872	11.4706	0.00193919	0.049449
FRG1	PD_Cerebellum	Microarray	-0.250403	9.16678	1.13e-05	0.0031537
FRG1	ASD_TemporalCortex	RNAseq	-0.145064	4.52062	9.59e-06	0.000213249
FRG1	SCZ_FrontalCortex	RNAseq	-0.0676075	4.16748	0.00754079	0.023547
GPATCH1	SCZ_TemporalCortex	Microarray	0.155553	3.82195	6.52e-06	0.000390662
GPATCH1	PD_FrontalCortex	RNAseq	0.107811	2.84365	0.00912473	0.0280067
GPKOW	PD_FrontalCortex	Microarray	-0.206655	9.81347	0.00045407	0.0379083
GPKOW	BD_FrontalCortex	Microarray	-0.0368561	7.75465	0.00221459	0.016081
GPKOW	ASD_FrontalCortex	RNAseq	-0.060757	3.2413	0.00242062	0.0261507
GPKOW	ASD_TemporalCortex	RNAseq	-0.0620001	3.94541	0.0121017	0.0417054
HNRNPA1	SCZ_TemporalCortex	Microarray	0.166713	11.9927	3.23e-08	1.46e-05
HNRNPA1	AD_TemporalCortex	RNAseq	0.231808	4.16247	0.0105884	0.0404871
HNRNPA1L2	ASD_TemporalCortex	Microarray	-0.137311	8.62702	0.000823619	0.0309926
HNRNPA1P7	SCZ_TemporalCortex	Microarray	0.167005	11.7568	5.82e-07	8.12e-05
HNRNPA2B1	BD_FrontalCortex	Microarray	-0.0678094	9.98835	1.2e-07	1.1e-05
HNRNPA2B1	AD_TemporalCortex	RNAseq	0.152365	8.34819	0.00167327	0.0105063
HNRNPA2B1	PD_FrontalCortex	RNAseq	0.125404	8.22656	1.15e-05	0.000146059
HNRNPA3	SCZ_TemporalCortex	Microarray	0.112884	9.27248	0.000262118	0.00452915
HNRNPA3	PD_FrontalCortex	RNAseq	0.0538268	8.08258	0.0115443	0.0337079
HNRNPA3	SCZ_FrontalCortex	RNAseq	0.0553515	7.75507	2.87e-06	3.47e-05
HNRNPAB	AD_Hippocampus	Microarray	0.0731993	10.1836	0.00216879	0.0269387
HNRNPAB	ASD_Cerebellum	Microarray	-0.105579	11.1463	0.00393075	0.0228057
HNRNPAB	BD_FrontalCortex	Microarray	-0.0504475	7.8969	7.83e-05	0.0013679
HNRNPAB	MDD_FrontalCortex	Microarray	-0.047271	9.35993	0.000212831	0.00559611
HNRNPAB	AD_TemporalCortex	RNAseq	0.247074	5.69411	0.0014719	0.00956115
HNRNPAB	BD_FrontalCortex	RNAseq	-0.0702072	4.09967	0.000520008	0.00829818
HNRNPAB	PD_FrontalCortex	RNAseq	0.128621	4.05017	0.000396556	0.00228825
HNRNPAB	SCZ_FrontalCortex	RNAseq	-0.0442424	4.44815	0.0100919	0.0299587
HNRNPCP2	AD_FrontalCortex	Microarray	-0.0511806	12.258	0.000467145	0.030974
HNRNPCP2	BD_FrontalCortex	Microarray	-0.0260503	9.47844	0.00424412	0.0255534
HNRNPD	SCZ_TemporalCortex	Microarray	0.0955299	9.00926	4.85e-05	0.00149175
HNRNPD	SCZ_FrontalCortex	RNAseq	0.0696896	6.24861	9.79e-08	2.14e-06
HNRNPF	PD_SubstantiaNigra	Microarray	0.21716	7.11699	6.67e-08	9.71e-06
HNRNPF	PD_FrontalCortex	RNAseq	0.157972	5.08799	8.5e-05	0.00068511
HNRNPH1	SCZ_TemporalCortex	Microarray	0.122343	7.72491	0.000237739	0.00425026
HNRNPH1	AD_TemporalCortex	RNAseq	0.128882	7.58812	0.00405413	0.020006
HNRNPH1	PD_FrontalCortex	RNAseq	0.121647	7.30066	0.000507331	0.00278037
HNRNPH2	PD_Striatum	Microarray	-0.268893	10.9815	8.39e-08	4.41e-05
HNRNPH2	ASD_TemporalCortex	RNAseq	-0.0926994	5.11496	0.0047858	0.0207
HNRNPH2	SCZ_FrontalCortex	RNAseq	-0.0324089	6.56447	0.00488199	0.0165597
HNRNPH3	AD_Neocortex	Microarray	0.408286	7.17274	1.51e-05	0.00257761
HNRNPH3	SCZ_TemporalCortex	Microarray	0.11322	9.30562	0.00195465	0.0175584
HNRNPH3	AD_TemporalCortex	RNAseq	0.268671	7.80722	0.00336022	0.017342
HNRNPH3	PD_FrontalCortex	RNAseq	0.159587	6.4001	6.01e-06	8.75e-05
HNRNPH3	SCZ_FrontalCortex	RNAseq	0.0608483	6.08129	0.00145413	0.00609643
HNRNPL	PD_SubstantiaNigra	Microarray	0.102262	8.09523	2.25e-05	0.000672143
HNRNPL	SCZ_FrontalCortex	Microarray	0.0431486	8.98391	0.00765342	0.0472819
HNRNPL	BD_FrontalCortex	Microarray	-0.0485665	8.23229	0.0020338	0.0152013
HNRNPL	ASD_FrontalCortex	RNAseq	-0.0503817	4.71266	0.00539575	0.042381
HNRNPL	PD_FrontalCortex	RNAseq	0.0581674	6.48217	0.0154011	0.0422625
HNRNPL	SCZ_FrontalCortex	RNAseq	-0.0564143	6.42697	2.35e-05	0.000198802
HNRNPUL1	BD_FrontalCortex	Microarray	-0.0381302	6.75806	0.000141414	0.00212234
HNRNPUL1	PD_FrontalCortex	RNAseq	0.0634493	6.44067	0.0134455	0.0379598
HNRNPUL1	SCZ_FrontalCortex	RNAseq	0.0380502	5.76266	0.00777172	0.024172
HNRNPUL2	ASD_Cerebellum	Microarray	0.241278	10.6189	3.57e-05	0.000655766
HNRNPUL2	SCZ_Striatum	Microarray	-0.20621	11.2292	0.000539822	0.023328
HNRNPUL2	SCZ_FrontalCortex	RNAseq	0.0602577	6.951	4.91e-05	0.000366943
HTATSF1	PD_SubstantiaNigra	Microarray	-0.111208	7.85126	0.00175762	0.0141249
HTATSF1	ASD_TemporalCortex	RNAseq	-0.0717211	5.81387	0.00230703	0.0119097
IK	BD_FrontalCortex	Microarray	-0.0446298	8.88203	5.25e-05	0.00100682
IK	ASD_TemporalCortex	RNAseq	-0.100706	4.98867	0.000269747	0.00249145
LSM1	ASD_Cerebellum	Microarray	-0.117901	11.42	0.00030543	0.00319687
LSM1	BD_FrontalCortex	Microarray	-0.043042	8.7947	3.73e-05	0.000785846
LSM1	MDD_FrontalCortex	Microarray	-0.0448872	9.24614	0.000427973	0.00853384
LSM1	AD_TemporalCortex	RNAseq	-0.191312	2.87948	0.00539862	0.0246965
LSM1	ASD_TemporalCortex	RNAseq	-0.0831312	2.35985	0.0063696	0.0256047
LSM1	PD_FrontalCortex	RNAseq	0.094462	3.43574	0.0154219	0.0422935
LSM1	SCZ_FrontalCortex	RNAseq	-0.0413974	3.64559	0.0117979	0.0339565
LSM10	ASD_Cerebellum	Microarray	-0.187189	8.96071	3.53e-05	0.000649987
LSM10	AD_TemporalCortex	RNAseq	0.248498	5.12827	0.00327311	0.0170638
LSM10	ASD_FrontalCortex	RNAseq	-0.0842521	2.09368	0.00541216	0.0423993
LSM10	ASD_TemporalCortex	RNAseq	-0.109306	2.51184	0.00266809	0.0133008
LSM10	PD_FrontalCortex	RNAseq	0.133469	3.79191	0.00334074	0.012558
LSM11	ASD_Cerebellum	Microarray	0.138183	7.50695	0.000126516	0.00167024
LSM11	PD_FrontalCortex	Microarray	0.419879	7.55245	0.000539895	0.0401844
LSM11	ASD_TemporalCortex	RNAseq	-0.157987	4.81535	0.000300442	0.00271176
LSM11	SCZ_FrontalCortex	RNAseq	0.0471412	5.49587	0.00395205	0.0139376
LSM12	PD_SubstantiaNigra	Microarray	0.0787758	7.80346	0.00810714	0.041258
LSM12	SCZ_TemporalCortex	Microarray	-0.07352	8.14639	0.00479914	0.0320619
LSM12	BD_FrontalCortex	RNAseq	-0.0634352	4.03462	0.000747423	0.0106479
LSM14A	SCZ_FrontalCortex	Microarray	-0.0258198	8.71539	0.00743011	0.0463177
LSM14A	PD_FrontalCortex	RNAseq	0.0701593	5.64262	0.00621818	0.0205526
LSM14B	PD_Striatum	Microarray	0.103808	6.78333	0.000422917	0.00925131
LSM14B	BD_FrontalCortex	Microarray	0.0367524	6.7121	0.00859824	0.0425728
LSM14B	PD_FrontalCortex	RNAseq	0.0910581	5.74694	7.57e-05	0.000623222
LSM2	AD_Hippocampus	Microarray	0.0678039	9.50941	0.00155577	0.0216398
LSM2	ASD_Cerebellum	Microarray	-0.244751	11.0611	6.16e-08	9.42e-06
LSM2	ASD_OccipitalCortex	Microarray	-0.500092	9.34805	1.73e-06	0.027261
LSM2	MDD_FrontalCortex	Microarray	-0.057012	6.97623	8.56e-05	0.00312779
LSM2	SCZ_FrontalCortex	RNAseq	-0.0722791	2.55328	0.000862592	0.00398917
LSM3	ASD_Cerebellum	Microarray	-0.169498	11.0674	0.00275196	0.0174283
LSM3	PD_Cerebellum	Microarray	-0.219327	10.2756	0.000982162	0.0304148
LSM3	BD_FrontalCortex	Microarray	-0.0311385	8.79744	0.00513424	0.0292013
LSM3	BD_FrontalCortex	RNAseq	-0.0562627	3.25423	0.000718993	0.0103601
LSM3	SCZ_FrontalCortex	RNAseq	-0.0722046	4.50708	7.33e-06	7.58e-05
LSM4	ASD_Cerebellum	Microarray	-0.182115	10.2988	0.000358849	0.00361209
LSM4	MDD_AnteriorCingulateCortex	Microarray	0.0433194	9.72082	0.00209115	0.0491801
LSM4	SCZ_FrontalCortex	RNAseq	-0.0789945	4.98219	1.61e-06	2.15e-05
LSM5	ASD_Cerebellum	Microarray	-0.0950709	8.92478	0.00758364	0.0377577
LSM5	PD_Cerebellum	Microarray	-0.232979	8.86515	0.000102984	0.00934773
LSM5	PD_Striatum	Microarray	-0.140202	8.84325	0.000275394	0.0070912
LSM5	BD_FrontalCortex	Microarray	-0.0468981	6.50035	0.00090213	0.00843091
LSM5	MDD_FrontalCortex	Microarray	-0.0450032	7.01743	0.00260524	0.0283453
LSM6	ASD_Cerebellum	Microarray	-0.142639	8.23369	0.00149392	0.0109123
LSM6	PD_SubstantiaNigra	Microarray	0.0719303	7.23355	0.00759379	0.0393712
LSM6	SCZ_FrontalCortex	Microarray	0.0405114	7.41971	0.00277824	0.0236915
LSM6	SCZ_Hippocampus	Microarray	0.121078	8.32896	0.00147215	0.0498086
LSM6	AD_TemporalCortex	RNAseq	0.414262	1.36855	0.000811308	0.00626017
LSM6	ASD_FrontalCortex	RNAseq	0.100087	2.54896	0.000263188	0.00619414
LSM6	SCZ_FrontalCortex	RNAseq	0.0592396	2.85481	0.00738493	0.0231634
LSM7	ASD_Cerebellum	Microarray	-0.201018	10.5379	6.06e-05	0.000960489
LSM7	PD_SubstantiaNigra	Microarray	-0.105038	7.15414	0.00155377	0.0129013
LSM7	SCZ_FrontalCortex	Microarray	0.0368429	7.44004	0.00321294	0.0260943
LSM7	SCZ_Hippocampus	Microarray	0.140165	8.43889	0.000403298	0.0261611
LSM7	BD_FrontalCortex	Microarray	-0.0553358	7.24568	0.00324964	0.0210377
LSM7	ASD_TemporalCortex	RNAseq	0.133566	3.05692	0.00148433	0.00865099
LSM7	PD_FrontalCortex	RNAseq	0.141469	4.23076	0.00608965	0.0202122
MAGOH	ASD_Cerebellum	Microarray	-0.110124	8.361	0.00224481	0.0149366
MAGOH	BD_FrontalCortex	Microarray	-0.0510856	5.78491	0.000943435	0.0086943
MFAP1	SCZ_TemporalCortex	Microarray	0.115809	7.84913	8.77e-06	0.000485873
MFAP1	BD_FrontalCortex	Microarray	-0.042655	8.30703	0.000703391	0.00706615
MFAP1	BD_FrontalCortex	RNAseq	0.0461923	3.90619	0.00661805	0.04464
MFAP1	PD_FrontalCortex	RNAseq	0.138422	3.76487	0.000172826	0.00119641
NAA38	SCZ_TemporalCortex	Microarray	-0.0975303	6.67754	0.00702004	0.0413369
NAA38	PD_FrontalCortex	RNAseq	0.155187	4.75126	4.84e-05	0.000443517
NHP2L1	ASD_FrontalCortex	Microarray	-0.138041	13.2017	0.000929399	0.0366088
NHP2L1	ASD_TemporalCortex	Microarray	-0.156581	13.3336	0.000611615	0.0271135
NOSIP	ASD_Cerebellum	Microarray	-0.170471	10.6938	0.00013507	0.00173805
NOSIP	PD_Striatum	Microarray	-0.121559	10.5704	0.000650373	0.0117067
NOSIP	AD_TemporalCortex	RNAseq	0.297988	4.6123	1.56e-07	1.91e-05
NOSIP	PD_FrontalCortex	RNAseq	0.088324	4.06728	0.00499315	0.0173424
PHF5A	ASD_Cerebellum	Microarray	-0.156614	10.1355	1.18e-05	0.000302356
PLRG1	AD_Hippocampus	Microarray	-0.0763401	9.2133	0.00196323	0.0252267
PLRG1	AD_Neocortex	Microarray	-0.27345	5.81316	0.000772881	0.0171137
PLRG1	AD_TemporalCortex	RNAseq	-0.155659	5.25135	0.00453876	0.02176
PLRG1	PD_FrontalCortex	RNAseq	-0.0967311	5.56834	0.00150789	0.00667873
PPIE	PD_Striatum	Microarray	-0.215826	9.12245	4.79e-06	0.000499855
PPIE	SCZ_TemporalCortex	Microarray	0.100956	6.6089	0.00170554	0.0160815
PPIE	PD_Medulla	Microarray	-0.341014	9.0713	1.83e-05	0.0182727
PPIE	AD_TemporalCortex	RNAseq	-0.209251	5.38138	0.000134973	0.001723
PPIG	ASD_TemporalCortex	Microarray	0.149122	8.08801	0.000910331	0.0326764
PPIG	PD_Striatum	Microarray	0.130717	7.65362	0.00192299	0.0232837
PPIG	PD_SubstantiaNigra	Microarray	0.0799275	7.29022	0.00450399	0.0273291
PPIG	MDD_FrontalCortex	Microarray	0.0616149	7.46106	0.00540404	0.0458772
PPIG	ASD_TemporalCortex	RNAseq	-0.101175	6.71221	0.000148542	0.00157751
PPIH	ASD_Cerebellum	Microarray	-0.275822	9.13794	8.08e-08	1.09e-05
PPIH	PD_Cerebellum	Microarray	-0.192626	8.75969	0.000168353	0.0118096
PPIH	PD_FrontalCortex	Microarray	-0.190869	9.25316	0.000175209	0.0253346
PPIH	PD_Striatum	Microarray	-0.194493	8.80649	4.27e-08	3.22e-05
PPIH	PD_Medulla	Microarray	-0.234216	9.41459	0.000231608	0.0435004
PPIH	AD_TemporalCortex	RNAseq	-0.207418	0.469592	0.0124866	0.0455971
PPIL1	ASD_Cerebellum	Microarray	-0.278579	8.66115	2.2e-05	0.000477956
PPIL2	SCZ_TemporalCortex	Microarray	-0.122069	8.77727	8.2e-06	0.000464466
PPIL2	ASD_TemporalCortex	RNAseq	0.067871	4.34693	0.00932904	0.0342196
PPIL3	AD_Hippocampus	Microarray	0.106787	9.81577	0.00321711	0.0350149
PPIL3	ASD_Cerebellum	Microarray	-0.139927	10.5669	0.00892565	0.0426866
PPIL3	AD_TemporalCortex	RNAseq	-0.418109	3.01464	0.000108383	0.00146869
PPIL3	ASD_TemporalCortex	RNAseq	-0.127888	2.97917	0.00512261	0.0217449
PPWD1	ASD_Cerebellum	Microarray	-0.0709687	8.0418	0.00493243	0.0273094
PPWD1	PD_SubstantiaNigra	Microarray	-0.0857062	5.36754	0.00503389	0.0294521
PPWD1	SCZ_FrontalCortex	Microarray	0.0560615	7.40277	1.65e-05	0.000564839
PPWD1	MDD_AnteriorCingulateCortex	Microarray	-0.0611226	7.09351	0.00061499	0.0262885
PPWD1	AD_TemporalCortex	RNAseq	-0.204859	4.54568	0.00597372	0.0266014
PPWD1	PD_FrontalCortex	RNAseq	-0.183864	5.22485	1.83e-08	1.35e-06
PPWD1	SCZ_FrontalCortex	RNAseq	0.0433914	4.60288	0.00100548	0.00451771
PQBP1	ASD_Cerebellum	Microarray	-0.323701	9.58155	8.35e-09	2.69e-06
PQBP1	ASD_TemporalCortex	Microarray	-0.186706	10.7123	3.2e-05	0.00677081
PQBP1	PD_Striatum	Microarray	-0.140925	7.56937	4.42e-06	0.000480568
PQBP1	PD_FrontalCortex	RNAseq	0.159877	4.76813	6.69e-07	1.65e-05
PQBP1	SCZ_FrontalCortex	RNAseq	-0.0486944	4.09505	0.00262969	0.00996268
PRCC	SCZ_FrontalCortex	Microarray	-0.0472663	7.90483	0.000390403	0.00573917
PRCC	BD_FrontalCortex	Microarray	-0.0571604	6.64039	1.53e-05	0.00040882
PRCC	PD_FrontalCortex	RNAseq	0.106158	5.298	4.19e-05	0.000398031
PRCC	SCZ_FrontalCortex	RNAseq	0.0441493	4.30167	0.00396048	0.0139606
PRPF19	ASD_Cerebellum	Microarray	0.109241	9.77899	0.00979232	0.0457217
PRPF19	ASD_TemporalCortex	Microarray	-0.183299	11.4313	5.93e-05	0.00927694
PRPF19	AD_TemporalCortex	RNAseq	-0.12533	7.06964	0.00845176	0.0343251
PRPF19	ASD_TemporalCortex	RNAseq	-0.1237	5.60694	0.000135099	0.00148916
PRPF19	SCZ_FrontalCortex	RNAseq	0.0775065	6.15751	2.12e-07	3.97e-06
PRPF3	AD_Neocortex	Microarray	0.161646	5.63854	0.00209738	0.0299596
PRPF3	ASD_Cerebellum	Microarray	-0.148757	9.62433	0.000169967	0.00203586
PRPF3	PD_Striatum	Microarray	-0.125001	9.34515	0.00180404	0.022557
PRPF3	AD_TemporalCortex	RNAseq	-0.235868	7.12021	5.26e-06	0.00019496
PRPF3	ASD_FrontalCortex	RNAseq	0.0718701	3.32986	0.00397048	0.0347228
PRPF31	SCZ_FrontalCortex	Microarray	0.0267178	7.71614	0.0044417	0.0323957
PRPF31	BD_FrontalCortex	Microarray	0.0407305	7.60975	0.000409848	0.00471537
PRPF31	BD_FrontalCortex	RNAseq	0.0549036	4.32167	0.000234596	0.00496286
PRPF31	PD_FrontalCortex	RNAseq	0.164458	4.49778	4.51e-07	1.23e-05
PRPF31	SCZ_FrontalCortex	RNAseq	0.0498596	4.39514	0.000451504	0.00231875
PRPF38A	AD_Hippocampus	Microarray	0.0861382	8.79093	3.85e-06	0.000386328
PRPF38A	AD_TemporalCortex	RNAseq	-0.146525	5.59148	0.00101443	0.00740596
PRPF4	ASD_Cerebellum	Microarray	-0.0773232	9.44387	0.00848221	0.0410642
PRPF4	ASD_FrontalCortex	Microarray	-0.153657	10.841	9.89e-05	0.0118222
PRPF4	ASD_TemporalCortex	Microarray	-0.131143	10.9952	0.000207509	0.016384
PRPF4	PD_Striatum	Microarray	-0.0829306	9.10231	0.000110294	0.00394802
PRPF4	AD_TemporalCortex	RNAseq	-0.136667	4.47393	0.0127322	0.0462311
PRPF40A	SCZ_FrontalCortex	Microarray	0.0576892	7.62269	9.38e-05	0.00205153
PRPF40A	BD_FrontalCortex	Microarray	0.100783	7.26448	2.7e-10	9.41e-08
PRPF40A	MDD_FrontalCortex	Microarray	0.047249	7.42043	0.00136475	0.0182499
PRPF4B	BD_FrontalCortex	Microarray	-0.037805	7.44454	0.00293771	0.0196619
PRPF4B	MDD_FrontalCortex	Microarray	-0.0552088	8.27049	0.000230727	0.0058687
PRPF4B	PD_FrontalCortex	RNAseq	0.0856539	5.62193	0.000645024	0.0033765
PRPF6	BD_FrontalCortex	Microarray	-0.0343181	8.5317	0.000484075	0.00531921
PRPF6	PD_FrontalCortex	RNAseq	0.0893372	5.82385	0.0133649	0.0377719
PRPF6	SCZ_FrontalCortex	RNAseq	0.0557657	5.95155	1.7e-05	0.000152287
PRPF8	AD_FrontalCortex	Microarray	0.0649856	12.0969	0.00109435	0.0467889
PRPF8	ASD_Cerebellum	Microarray	0.170658	11.1305	0.00338076	0.0203401
PRPF8	BD_Cerebellum	Microarray	0.10054	11.4118	3.91928	0.000177653
PRPF8	BD_FrontalCortex	Microarray	0.0392401	9.25772	3.24e-05	0.000719997
PRPF8	PD_FrontalCortex	RNAseq	0.0870862	7.26229	0.00144131	0.00644553
PRPF8	SCZ_FrontalCortex	RNAseq	0.0804212	8.01376	2.19e-10	1.27e-08
PUF60	ASD_TemporalCortex	Microarray	-0.104211	12.6246	0.00194317	0.0498072
PUF60	PD_Striatum	Microarray	-0.0997393	10.152	0.00231428	0.0262233
PUF60	PD_SubstantiaNigra	Microarray	-0.0733455	8.42572	0.00726347	0.0382312
PUF60	BD_FrontalCortex	Microarray	-0.0374177	9.19436	3.21e-05	0.000715753
PUF60	PD_FrontalCortex	RNAseq	0.0864016	6.10963	0.00344122	0.012862
RBM10	AD_Hippocampus	Microarray	-0.106484	10.183	4.58e-07	9.74e-05
RBM10	ASD_Cerebellum	Microarray	0.152667	11.5835	0.00818535	0.039946
RBM10	ASD_FrontalCortex	Microarray	0.121078	12.7146	0.00179999	0.0483249
RBM10	BD_FrontalCortex	Microarray	-0.0379049	8.19807	0.0011114	0.00986486
RBM10	ASD_TemporalCortex	RNAseq	0.0694043	5.17912	0.00653333	0.0260467
RBM10	PD_FrontalCortex	RNAseq	0.158366	5.44742	3.42e-05	0.000340885
RBM10	SCZ_FrontalCortex	RNAseq	0.0542376	4.98058	0.000542546	0.00269446
RBM17	AD_Hippocampus	Microarray	0.107186	10.308	2.34e-07	6.5e-05
RBM17	ASD_TemporalCortex	Microarray	0.143584	12.5082	0.000159062	0.0148162
RBM17	PD_FrontalCortex	RNAseq	0.155853	5.98249	6.86e-07	1.68e-05
RBM22	PD_SubstantiaNigra	Microarray	0.0691534	6.66116	0.000269143	0.00377826
RBM22	BD_FrontalCortex	Microarray	-0.049991	6.2714	5.72e-05	0.00107442
RBM22	MDD_FrontalCortex	Microarray	-0.0401573	7.38387	0.00209232	0.0244039
RBM22	AD_TemporalCortex	RNAseq	0.166525	5.67641	0.000687444	0.0056031
RBM22	PD_FrontalCortex	RNAseq	0.0937006	4.87396	0.00205834	0.00857597
RBM25	PD_Striatum	Microarray	-0.12611	10.4326	0.00142959	0.0195792
RBM25	SCZ_Striatum	Microarray	-0.147595	10.5146	0.000112045	0.00989188
RBM25	SCZ_TemporalCortex	Microarray	0.14077	7.89979	0.000270867	0.00460983
RBM25	MDD_AnteriorCingulateCortex	Microarray	-0.0532127	9.43699	0.00166895	0.043708
RBM25	PD_FrontalCortex	RNAseq	-0.110068	7.65739	0.00451496	0.0159654
RBM25	SCZ_FrontalCortex	RNAseq	-0.0314139	6.92137	0.0142354	0.0394215
RBM5	AD_Hippocampus	Microarray	-0.091361	10.4045	9.38e-05	0.00345974
RBM5	ASD_Cerebellum	Microarray	-0.0838516	10.422	0.0078525	0.0387779
RBM5	PD_Striatum	Microarray	-0.157595	11.876	0.000261322	0.0068708
RNF113A	ASD_FrontalCortex	Microarray	-0.147299	9.81859	0.00180634	0.0483249
RNF113A	AD_TemporalCortex	RNAseq	0.20413	3.14528	0.00594263	0.0264859
RNF113A	ASD_FrontalCortex	RNAseq	-0.109222	1.32418	0.0029179	0.0292092
RNF113A	ASD_TemporalCortex	RNAseq	-0.198383	2.03831	2.56e-06	8.01e-05
RNPC3	ASD_Cerebellum	Microarray	-0.105516	8.19202	0.00173779	0.0122636
RNPC3	PD_Medulla	Microarray	0.213532	8.82062	0.000212479	0.04084
RNPC3	AD_TemporalCortex	RNAseq	-0.270683	5.11293	0.000469381	0.00421077
RNPC3	ASD_TemporalCortex	RNAseq	-0.0757523	5.5816	0.00719704	0.0280138
RNPC3	PD_FrontalCortex	RNAseq	0.138595	4.76555	0.00469267	0.0164373
SART1	ASD_FrontalCortex	Microarray	0.148436	8.48663	0.000824695	0.0343134
SART1	PD_SubstantiaNigra	Microarray	-0.105728	6.41989	0.000192593	0.00298158
SART1	BD_FrontalCortex	Microarray	-0.0725888	6.98791	1.17e-09	2.98e-07
SART1	BD_FrontalCortex	RNAseq	0.049012	4.86374	0.00139315	0.0159984
SART1	PD_FrontalCortex	RNAseq	0.119877	4.74365	0.000463917	0.00260215
SART1	SCZ_FrontalCortex	RNAseq	0.0874167	4.499	1.72e-08	4.99e-07
SF1	ASD_Cerebellum	Microarray	-0.209309	8.28102	0.000855966	0.00709369
SF1	ASD_TemporalCortex	Microarray	-0.3418	10.1395	6.6e-05	0.0094198
SF1	PD_Striatum	Microarray	-0.211853	10.4232	0.000844981	0.0139844
SF1	PD_FrontalCortex	RNAseq	0.0827904	7.1397	0.015918	0.0433265
SF1	SCZ_FrontalCortex	RNAseq	0.0602731	5.97895	1.87e-05	0.000164866
SF3A1	AD_Hippocampus	Microarray	-0.0540412	8.93281	0.00346365	0.0367292
SF3A1	ASD_FrontalCortex	Microarray	-0.149853	9.91737	0.000263627	0.0194271
SF3A1	SCZ_FrontalCortex	Microarray	0.0277699	8.93325	0.00230832	0.0207698
SF3A1	BD_FrontalCortex	Microarray	0.0539997	8.03029	1.57e-07	1.34e-05
SF3A1	PD_FrontalCortex	RNAseq	0.0833643	5.66439	0.00551439	0.0186648
SF3A1	SCZ_FrontalCortex	RNAseq	0.0457661	5.8592	2.72e-05	0.000224832
SF3A3	AD_Neocortex	Microarray	-0.312231	3.9512	7.51e-05	0.00550959
SF3A3	SCZ_TemporalCortex	Microarray	-0.144209	8.22291	4.86e-05	0.00149175
SF3A3	ASD_TemporalCortex	RNAseq	-0.0610712	4.93359	0.00254688	0.0128137
SF3A3	PD_FrontalCortex	RNAseq	0.0712542	4.96232	0.0104556	0.0311856
SF3B1	ASD_TemporalCortex	Microarray	-0.135296	11.5662	0.00078118	0.0306466
SF3B1	MDD_FrontalCortex	Microarray	-0.0323902	10.7956	0.00479227	0.0425927
SF3B3	PD_Striatum	Microarray	0.0740225	8.90815	0.00406829	0.0370595
SF3B3	SCZ_TemporalCortex	Microarray	-0.0602302	9.3488	0.00496345	0.0326671
SF3B3	PD_FrontalCortex	RNAseq	0.0783008	5.62982	0.013024	0.0370742
SF3B3	SCZ_FrontalCortex	RNAseq	0.0616564	6.55688	1.24e-07	2.58e-06
SF3B4	MDD_FrontalCortex	Microarray	-0.0710171	8.67661	9.21e-07	0.000179581
SF3B4	ASD_TemporalCortex	RNAseq	0.121376	2.24042	0.00457114	0.0200785
SF3B4	PD_FrontalCortex	RNAseq	0.160143	4.27629	0.000334004	0.00200223
SF3B4	SCZ_FrontalCortex	RNAseq	0.0692298	3.07336	0.00035286	0.00188307
SF3B5	AD_Hippocampus	Microarray	-0.0676494	9.90129	0.00275392	0.031726
SF3B5	AD_Neocortex	Microarray	-0.301838	7.41409	0.00055845	0.0143228
SF3B5	ASD_Cerebellum	Microarray	-0.19634	10.049	0.000134769	0.00173559
SF3B5	BD_FrontalCortex	Microarray	-0.039503	8.62427	0.000282194	0.00355141
SF3B5	MDD_FrontalCortex	Microarray	-0.0405618	9.47146	0.00176876	0.0218635
SF3B5	AD_TemporalCortex	RNAseq	-0.129269	5.26339	0.00501617	0.0233699
SMNDC1	SCZ_TemporalCortex	Microarray	0.121236	6.18612	0.00159191	0.0152953
SMNDC1	BD_FrontalCortex	Microarray	-0.0411063	7.10864	0.0030663	0.0202443
SMNDC1	AD_TemporalCortex	RNAseq	0.142473	5.28136	0.00620305	0.0273698
SMNDC1	BD_FrontalCortex	RNAseq	-0.0438417	4.59273	0.00551882	0.0396313
SMNDC1	PD_FrontalCortex	RNAseq	0.160871	3.90876	3.22e-07	9.54e-06
SMU1	PD_Striatum	Microarray	-0.0694187	8.00621	0.00226763	0.0259118
SMU1	PD_SubstantiaNigra	Microarray	0.0957102	6.5079	0.000307597	0.00409265
SMU1	SCZ_TemporalCortex	Microarray	-0.0789565	8.27275	0.00151973	0.0148241
SNIP1	SCZ_TemporalCortex	Microarray	-0.114991	6.37604	0.00380784	0.0272833
SNIP1	BD_FrontalCortex	Microarray	0.0379103	5.57454	0.00649116	0.0343396
SNRNP200	ASD_Cerebellum	Microarray	0.179328	9.19078	1.92e-05	0.000432087
SNRNP200	PD_Cerebellum	Microarray	-0.195784	10.0964	0.00133673	0.0351869
SNRNP200	AD_TemporalCortex	RNAseq	-0.111702	8.32519	0.0111624	0.0420457
SNRNP200	SCZ_FrontalCortex	RNAseq	0.0670708	7.01739	3.23e-09	1.2e-07
SNRNP25	MDD_FrontalCortex	Microarray	-0.0472924	9.85861	0.00364482	0.0357257
SNRNP25	ASD_TemporalCortex	RNAseq	-0.125053	3.55717	0.000739712	0.00518214
SNRNP25	BD_FrontalCortex	RNAseq	-0.0815589	5.08901	8.05e-05	0.00243252
SNRNP25	SCZ_FrontalCortex	RNAseq	-0.110462	4.90362	6.19e-08	1.47e-06
SNRNP35	SCZ_Hippocampus	Microarray	0.101132	6.83082	0.00116151	0.0446452
SNRNP35	BD_FrontalCortex	Microarray	-0.0469023	6.97927	0.000373433	0.0044503
SNRNP35	PD_FrontalCortex	RNAseq	0.102788	3.7119	0.00132505	0.0060281
SNRNP40	AD_Neocortex	Microarray	0.444786	2.45428	0.00132763	0.0232487
SNRNP40	ASD_Cerebellum	Microarray	-0.178373	9.33313	8.97e-07	5.1e-05
SNRNP40	SCZ_Hippocampus	Microarray	-0.142211	8.02157	0.000109587	0.0125846
SNRNP40	ASD_TemporalCortex	RNAseq	-0.126918	4.90982	0.00032269	0.00285348
SNRNP70	ASD_Cerebellum	Microarray	-0.168188	11.328	0.00288359	0.0179873
SNRNP70	SCZ_FrontalCortex	Microarray	0.0325977	9.30596	0.00436029	0.0319892
SNRNP70	BD_FrontalCortex	Microarray	0.0437356	8.89692	0.000390456	0.00457096
SNRNP70	PD_FrontalCortex	RNAseq	0.179457	8.34515	4.01e-06	6.4e-05
SNRPA	PD_Striatum	Microarray	0.0869651	7.55545	0.00623021	0.0484527
SNRPA	SCZ_FrontalCortex	Microarray	0.050344	7.54272	2.08e-07	2e-05
SNRPA	SCZ_Striatum	Microarray	0.121114	8.42664	0.000922683	0.0318239
SNRPA	AD_TemporalCortex	RNAseq	0.165255	5.19842	0.00121076	0.00835907
SNRPA	ASD_TemporalCortex	RNAseq	0.116907	2.60912	0.000805185	0.00550538
SNRPA	PD_FrontalCortex	RNAseq	0.0832902	4.12996	0.0174188	0.0466355
SNRPA1	ASD_Cerebellum	Microarray	-0.226977	10.9178	2.57e-07	2.24e-05
SNRPA1	PD_FrontalCortex	RNAseq	-0.190955	5.29369	2.98e-05	0.000307295
SNRPB	AD_FrontalCortex	Microarray	0.0778952	9.11917	0.00104608	0.0458318
SNRPB	ASD_Cerebellum	Microarray	-0.320806	10.8911	6.75e-07	4.34e-05
SNRPB	ASD_TemporalCortex	Microarray	-0.193509	12.2148	3.7e-05	0.00708212
SNRPB	PD_Cerebellum	Microarray	-0.216454	10.3631	0.00264275	0.049948
SNRPB	PD_Striatum	Microarray	-0.128848	9.6489	0.00231702	0.0262233
SNRPB	PD_SubstantiaNigra	Microarray	0.123673	7.94388	9.04e-05	0.00171206
SNRPB	BD_FrontalCortex	Microarray	0.050992	8.32312	3.61e-05	0.000766953
SNRPB	PD_FrontalCortex	RNAseq	0.119755	4.60279	0.00258771	0.0102258
SNRPB	SCZ_FrontalCortex	RNAseq	-0.0875477	3.84652	1.35e-05	0.000127262
SNRPB2	ASD_Cerebellum	Microarray	-0.227	10.7213	1.19e-07	1.42e-05
SNRPB2	PD_Striatum	Microarray	-0.102662	10.2364	0.00033493	0.00790863
SNRPB2	MDD_FrontalCortex	Microarray	-0.0370227	9.12929	0.00315855	0.032369
SNRPB2	AD_TemporalCortex	RNAseq	-0.122718	3.99407	0.00668733	0.0288624
SNRPB2	PD_FrontalCortex	RNAseq	0.0696624	4.76174	0.00612388	0.020301
SNRPB2	SCZ_FrontalCortex	RNAseq	-0.0646791	4.54748	3.86e-06	4.46e-05
SNRPC	ASD_Cerebellum	Microarray	-0.185099	9.76648	1.51e-06	7.15e-05
SNRPC	SCZ_FrontalCortex	Microarray	0.0296343	8.61634	0.000252267	0.00417048
SNRPC	BD_FrontalCortex	Microarray	0.0357597	8.24575	0.00055306	0.0058916
SNRPC	ASD_FrontalCortex	RNAseq	-0.0810226	2.32348	0.0050205	0.0404937
SNRPD1	AD_EntorhinalCortex	Microarray	-0.162576	8.06216	2.83e-06	0.031958
SNRPD1	ASD_Cerebellum	Microarray	-0.176693	8.24522	1.52e-06	7.16e-05
SNRPD1	PD_Striatum	Microarray	-0.149185	8.32312	6.3e-07	0.000152658
SNRPD1	MDD_FrontalCortex	Microarray	-0.0505132	8.14109	0.00168502	0.0211057
SNRPD2	ASD_Cerebellum	Microarray	-0.152708	12.8229	1.18e-05	0.000301961
SNRPD2	SCZ_FrontalCortex	Microarray	0.0308286	10.0537	0.000529983	0.0070811
SNRPD2	SCZ_ParietalCortex	Microarray	-0.0612033	8.26928	9.51e-05	0.0273188
SNRPD3	ASD_FrontalCortex	Microarray	0.157293	9.50859	0.000101317	0.0118895
SNRPD3	PD_SubstantiaNigra	Microarray	-0.105877	7.93372	0.000184522	0.00290414
SNRPE	BD_FrontalCortex	Microarray	-0.0516497	7.66966	0.000244082	0.00315261
SNRPE	SCZ_FrontalCortex	RNAseq	-0.0506841	4.02623	0.0117546	0.0338651
SNRPF	ASD_Cerebellum	Microarray	-0.202421	10.7466	8.96e-06	0.000243628
SNRPF	PD_FrontalCortex	Microarray	-0.241203	10.1387	0.000211576	0.0273331
SNRPF	BD_FrontalCortex	Microarray	-0.0500185	6.87116	0.000393611	0.00459167
SNRPF	AD_TemporalCortex	RNAseq	0.182594	1.11208	0.0130641	0.0471586
SNW1	AD_Hippocampus	Microarray	0.0452444	8.60955	0.00220943	0.0273714
SNW1	BD_FrontalCortex	Microarray	-0.0330359	7.71451	0.000725097	0.00719236
SRRM2	SCZ_FrontalCortex	Microarray	0.0601122	7.77094	6.49e-05	0.00157738
SRRM2	PD_FrontalCortex	RNAseq	0.268794	7.98277	5.85e-07	1.49e-05
SRRM2	SCZ_FrontalCortex	RNAseq	0.096225	7.85805	1.82e-06	2.38e-05
SRSF1	BD_FrontalCortex	Microarray	-0.0360003	7.73664	0.00495364	0.0285221
SRSF1	PD_FrontalCortex	RNAseq	0.0812254	6.31582	0.00140147	0.00630619
SRSF11	SCZ_FrontalCortex	Microarray	0.0435375	9.41047	0.000441728	0.00625941
SRSF11	ASD_TemporalCortex	RNAseq	-0.0689994	7.47792	0.00440041	0.0195452
SRSF12	AD_Neocortex	Microarray	-0.239512	3.87783	0.000769715	0.0171137
SRSF12	SCZ_Hippocampus	Microarray	0.181523	8.56916	0.000272671	0.0208769
SRSF12	BD_FrontalCortex	RNAseq	-0.0516171	4.36523	0.00403519	0.032513
SRSF2	PD_SubstantiaNigra	Microarray	-0.107391	9.30125	0.000883242	0.00861582
SRSF2	SCZ_FrontalCortex	Microarray	-0.0309094	9.95149	0.00147229	0.0150123
SRSF2	SCZ_TemporalCortex	Microarray	0.109066	9.28321	0.0018576	0.0169631
SRSF2	SCZ_FrontalCortex	RNAseq	-0.0552907	6.05812	6.29e-05	0.000451458
SRSF3	SCZ_Hippocampus	Microarray	0.113514	11.4363	0.000170144	0.0157384
SRSF3	SCZ_TemporalCortex	Microarray	0.0771889	8.49403	0.00860312	0.0472054
SRSF3	MDD_FrontalCortex	Microarray	-0.0532676	10.2203	9.33e-06	0.000713503
SRSF3	SCZ_FrontalCortex	RNAseq	-0.0554569	6.29803	0.000997892	0.00449006
SRSF4	SCZ_TemporalCortex	Microarray	0.102318	8.09049	7.91e-05	0.00207983
SRSF4	AD_TemporalCortex	RNAseq	0.162437	6.66427	0.00150052	0.00971186
SRSF4	PD_FrontalCortex	RNAseq	0.0898195	5.53727	0.00110146	0.00519775
SRSF5	AD_Neocortex	Microarray	0.21789	7.90484	0.00237536	0.0324962
SRSF5	SCZ_FrontalCortex	Microarray	0.0335019	10.8181	0.00358548	0.0278527
SRSF8	SCZ_TemporalCortex	Microarray	0.0665327	8.26685	0.00373246	0.0270288
SRSF9	BD_FrontalCortex	Microarray	-0.0321856	9.14707	0.0018654	0.0143974
SRSF9	PD_FrontalCortex	RNAseq	0.13985	6.0002	3.62e-07	1.05e-05
SUGP1	BD_FrontalCortex	Microarray	0.0311145	7.64711	0.00163019	0.0130691
SUGP1	ASD_TemporalCortex	RNAseq	-0.0694698	4.48987	0.000661498	0.00479037
SUGP1	PD_FrontalCortex	RNAseq	0.0940255	5.32229	0.000148154	0.00105444
SYF2	AD_Hippocampus	Microarray	0.0612089	9.71163	0.00039683	0.00912193
SYF2	SCZ_TemporalCortex	Microarray	-0.0549086	8.78845	0.0038066	0.0272833
SYF2	PD_FrontalCortex	RNAseq	0.152064	4.25393	2.64e-08	1.62e-06
TFIP11	SCZ_TemporalCortex	Microarray	-0.0662315	7.84665	0.00847575	0.0468122
TFIP11	BD_FrontalCortex	Microarray	0.0311924	7.297	0.00550041	0.0305881
TFIP11	BD_FrontalCortex	RNAseq	0.0558497	4.00792	0.00462371	0.0353466
TFIP11	PD_FrontalCortex	RNAseq	0.184229	4.50516	9.51e-07	2.15e-05
THRAP3	PD_SubstantiaNigra	Microarray	0.109128	5.64577	4.58e-05	0.00106239
THRAP3	SCZ_FrontalCortex	Microarray	0.0315732	7.25571	0.00164625	0.0162092
THRAP3	SCZ_TemporalCortex	Microarray	0.0705207	7.20849	0.00375465	0.0271114
THRAP3	MDD_FrontalCortex	Microarray	0.0431929	7.54493	0.00401119	0.0379146
TXNL4A	AD_Hippocampus	Microarray	0.0576427	8.7866	0.00141487	0.0205424
TXNL4A	BD_FrontalCortex	Microarray	-0.045772	9.89366	1.93e-05	0.000489002
TXNL4A	SCZ_FrontalCortex	RNAseq	-0.0574731	5.23159	0.000233361	0.00134463
U2AF2	SCZ_FrontalCortex	Microarray	-0.0351252	8.00211	0.00147033	0.0150047
U2AF2	SCZ_TemporalCortex	Microarray	-0.0855206	6.41758	0.00929811	0.0497388
U2AF2	AD_TemporalCortex	RNAseq	0.160817	7.81512	0.00112921	0.00797663
U2AF2	PD_FrontalCortex	RNAseq	0.276415	5.62558	1.26e-12	1.69e-09
U2AF2	SCZ_FrontalCortex	RNAseq	-0.0435214	5.43613	0.000378315	0.0019958
U2SURP	PD_SubstantiaNigra	Microarray	-0.101115	7.2684	0.00783886	0.0403577
U2SURP	ASD_TemporalCortex	RNAseq	-0.0695661	7.24258	0.00662294	0.0262957
U2SURP	PD_FrontalCortex	RNAseq	-0.0828031	6.83482	0.00511688	0.0176326
WBP11	ASD_Cerebellum	Microarray	0.111883	10.3094	0.00067272	0.00589116
WBP11	SCZ_TemporalCortex	Microarray	-0.0753152	9.91379	0.00843839	0.0466755
WBP11	SCZ_FrontalCortex	RNAseq	0.0443316	5.53549	4.48e-05	0.000340675
WBP4	PD_SubstantiaNigra	Microarray	0.0840447	6.86341	0.00371546	0.0239969
WBP4	ASD_TemporalCortex	RNAseq	-0.0719334	4.5723	0.00603296	0.0246723
XAB2	ASD_Cerebellum	Microarray	0.122444	10.1357	0.00159631	0.0115108
XAB2	PD_Striatum	Microarray	0.10502	7.65022	0.00142932	0.0195792
XAB2	BD_FrontalCortex	RNAseq	0.0711992	4.92881	8.13e-05	0.00244157
XAB2	PD_FrontalCortex	RNAseq	0.0914642	4.87182	0.00137657	0.00622239
XAB2	SCZ_FrontalCortex	RNAseq	0.137751	4.42153	6.56e-16	4.39e-13
YBX1	AD_Neocortex	Microarray	0.957124	3.11635	0.00449859	0.0457237
YBX1	ASD_FrontalCortex	Microarray	0.138738	11.3076	0.000971703	0.0371178
YBX1	PD_SubstantiaNigra	Microarray	0.143624	9.54115	7.91e-06	0.000319562
YBX1	BD_FrontalCortex	Microarray	-0.0358901	9.14686	0.00193296	0.0147385
YBX1	AD_TemporalCortex	RNAseq	0.29044	6.5203	0.000232206	0.00251464
YBX1	ASD_TemporalCortex	RNAseq	0.149526	6.09431	4.34e-05	0.000646544
ZCRB1	ASD_FrontalCortex	Microarray	-0.125099	10.4729	0.000262562	0.0194271
ZCRB1	SCZ_TemporalCortex	Microarray	0.0865888	8.53226	0.00465687	0.0313617
ZCRB1	SCZ_FrontalCortex	RNAseq	-0.0468885	4.85641	0.00357279	0.0127835
ZMAT5	ASD_FrontalCortex	Microarray	0.0935477	8.96401	0.00184207	0.0483249
ZMAT5	PD_Striatum	Microarray	-0.142179	6.4427	9.25e-05	0.00354079
ZMAT5	PD_Medulla	Microarray	-0.26492	8.73076	9.53e-05	0.0300493
ZMAT5	BD_Striatum	RNAseq	0.353996	2.78098	0.000559407	0.0403718
ZRSR2	AD_FrontalCortex	Microarray	0.095256	8.3258	0.000255126	0.0239645
ZRSR2	PD_SubstantiaNigra	Microarray	0.0764184	6.75311	0.00172992	0.0139786
ZRSR2	SCZ_TemporalCortex	Microarray	0.101814	6.33957	0.00259229	0.0213437
ZRSR2	PD_FrontalCortex	RNAseq	0.150084	3.3651	0.0172822	0.0463809
