# Supplementary material for: Dysregulated Spliceosome Gene Expression May Be a Common Process in Brains of Neurological and Psychiatric Disorders
Source: Research Square preprint supplement (doi:10.21203/rs.3.rs-1184033/v1), 2021-12-22
Supplement: Supplementary file 6 [file ed4e12428fe92d666f890ad6.xlsx]

## Sheet: Online Resource 5
Online Resource 5. Overlapped genes among different disorders in the shared iterms
Overlapped genes	18 GO terms	6 pathways	2 PPI terms
LSM7	ASD, BD, SCZ, PD	NA	ASD, BD, PD, SCZ
FAM50A	ASD, BD, MDD, PD	NA	NA
LSM5	ASD, BD, MDD, PD	NA	NA
SF3B5	AD, ASD, BD, MDD	NA	AD, ASD, BD, MDD
HNRNPAB	AD, ASD, BD, MDD	NA	NA
SF3A1	AD, ASD, BD, SCZ	NA	AD, ASD, BD, SCZ
YBX1	AD, ASD, BD, PD	AD, ASD, BD, MDD, PD, SCZ	NA
SNRPB	AD, ASD, BD, PD	AD, ASD, BD, MDD, PD, SCZ	NA
