# Supplementary material for: Dysregulated Spliceosome Gene Expression May Be a Common Process in Brains of Neurological and Psychiatric Disorders
Source: Research Square preprint supplement (doi:10.21203/rs.3.rs-1184033/v1), 2021-12-22
Supplement: Supplementary file 7 [file f4b53cd2e8856ea5f840f5f3.xlsx]

## Sheet: Online Resource 7
Online Resource 7. GWAS summary statistics of the 10 sig.dSGs with SCZ GWAS signals
Position	GeneName	avsnp142	CHR	Start	End	A1	A2	SNP	FRQ_A_67390	FRQ_U_94015	INFO	OR	SE	P	ngt	Direction	HetISqt	HetDf	HetPVa	Nca	Nco	Neff
43885291	HNRNPF	rs61860887	17	43885291	43885291	G	A	rs62057101	0.805	0.797	0.979	1.06396	0.0107	7.499e-09	0	+?--+++--???+------+-------?????-+-------??+----+-+-+----------+-+--+?-+-+-++-+-+-+--+--++	0	77	0.8426	55085	78957	60448.1
140036681	IK	rs778595	5	140036681	140036681	G	A	rs778595	0.547	0.553	0.997	0.95849	0.0077	3.989e-08	0	+++-++++-+-+-+-+++++---+++-++--+++-+----+++++++--+++++++-++-+++-+++--+++-+++++++++++--+-+-	9.5	89	0.2339	67390	94015	73173.9
140040665	IK	rs778597	5	140040665	140040665	G	A	rs778597	0.547	0.553	0.998	0.95839	0.0077	3.587e-08	17	+++-++++-+-+-+-+++++---+++-++--+++-+----+++++++--+++++++-++-+++-+++--+++-+++++++++++--+-+-	9.6	89	0.2316	67390	94015	73173.9
38020408	LSM1	rs55736052	8	38020408	38020408	T	C	rs55736052	0.743	0.734	0.959	1.05169	0.0089	1.718e-08	0	+-++-++-+++++++++++-++-+----+-+++--+-+--+++-+++++++-++++++-+++++----++-++++-+--+++++-+++++	0	89	0.6751	67390	94015	73173.9
38021982	LSM1	rs76873509	8	38021982	38021982	C	T	rs76873509	0.756	0.747	0.977	1.05085	0.009	3.736e-08	0	-++-+--++----------+--+-++++-+--++----++-----------+------+------+++--+-+--+-++-----+----+	0	89	0.5905	67390	94015	73173.9
38025511	LSM1	rs145151767	8	38025511	38025511	G	A	rs145151767	0.76	0.751	0.974	1.05159	0.0091	2.845e-08	0	-++-+--------------+--+-++++-+--++----++-----------+------+------+++--+----+-++-----+-----	0	89	0.5655	67390	94015	73173.9
38025512	LSM1	rs138824104	8	38025512	38025512	C	T	rs138824104	0.76	0.751	0.974	1.05169	0.0091	2.634e-08	0	-++-+--------------+--+-++++-+--++----++-----------+------+------+++--+----+-++-----+-----	0	89	0.5642	67390	94015	73173.9
38031345	LSM1	rs16887244	8	38031345	38031345	A	G	rs16887244	0.756	0.747	0.996	1.05033	0.0089	3.568e-08	91	+--+-+++-++++++++++-++-+----+-++--++++--+++++++++++-++++++-++++++---++-+-++-+--+++++-++++-	0	89	0.5664	67390	94015	73173.9
38032158	LSM1	rs59911155	8	38032158	38032158	G	A	rs59911155	0.756	0.747	0.995	1.05012	0.0089	4.022e-08	0	-++-+---+----------+--+-++++-+--++--+-++-----------+------+------+++--+-+--+-++-----+----+	0	89	0.5466	67390	94015	73173.9
31765984	LSM2	rs2736425	6	31765984	31765984	G	A	rs2736425	0.908	0.891	1	1.16707	0.0145	1.494e-26	0	+?++-??-+???----+----+----+?????--+----+-??+-------+----+-+-------+++?-------++----------+	29.3	75	0.01043	53386	77258	58749.1
31766660	LSM2	rs2763980	6	31766660	31766660	C	T	rs2763980	0.908	0.891	1	1.16602	0.0145	3.093e-26	0	+?++-??-+???----+----+----+?????--+----+-??+-------+----+-+-------+++?-------++----------+	29.1	75	0.01108	53386	77258	58749.1
31768799	LSM2	rs681331	6	31768799	31768799	A	C	rs681331	0.908	0.891	1	1.16719	0.0145	1.45e-26	0	-?--+??+-???++++-++++-++++-?????++-++++-+??-+++++++-++++-+-+++++++---?+++++++--++++++++++-	29.3	75	0.01068	53386	77258	58749.1
31771916	LSM2	rs1150748	6	31771916	31771916	G	C	rs1150748	0.647	0.663	1	0.94658	0.0083	3.048e-11	0	-+-----++???-+++++++-+++--++--++++--+++-++---+++++-++++++++-+-++++-++--+++--++-+++++++++++	42.1	86	3.284e-05	64837	90061	70162.9
31772093	LSM2	rs625421	6	31772093	31772093	C	A	rs625421	0.908	0.891	1	1.16719	0.0145	1.421e-26	0	+?++-??-+???----+----+----+?????--+----+-??+-------+----+-+-------+++?-------++----------+	29.1	75	0.01114	53386	77258	58749.1
44102328	MFAP1	rs693919	15	44102328	44102328	G	A	rs693919	0.272	0.28	0.998	0.94762	0.0086	4.301e-10	9	+-+--+-++-+++++++-+-+-+++++-+++-++-++++-++++++++-+++-+-++-+-+++++++++-+++++++-+--+++++++-+	2.8	89	0.4038	67390	94015	73173.9
44110142	MFAP1	rs575082	15	44110142	44110142	A	G	rs575082	0.273	0.28	0.999	0.94847	0.0086	8.395e-10	2	-+-++-+--+-------+-+-+-----+---+--+-------------+---+-+--+-+---------+-------+-++-------+-	3.9	89	0.3769	67390	94015	73173.9
44112146	MFAP1	rs35866764	15	44112146	44112146	A	C	rs35866764	0.295	0.301	0.991	0.95094	0.0085	3.363e-09	0	-+-++-+--+-------+-+-+-----+---+--+----+--------+-----+--+-+---------+-------+-++-------+-	0	89	0.6342	67390	94015	73173.9
44113782	MFAP1	rs663214	15	44113782	44113782	T	G	rs663214	0.295	0.3	0.993	0.95113	0.0085	3.756e-09	19	-+-++-+--+-------+-+-+-----+---+--+----+--------+-----+--+-+---------+-------+-++-------+-	0	89	0.6454	67390	94015	73173.9
44114527	MFAP1	rs2955969	15	44114527	44114527	G	A	rs2955969	0.273	0.28	0.999	0.94876	0.0086	1.081e-09	0	+-+--+-++-+++++++-+-+-+++++-+++-++-+++++++++++++-+++-+-++-+-+++++++++-+++++++-+--+++++++-+	3.6	89	0.3827	67390	94015	73173.9
50067508	NOSIP	rs10412446	19	50067508	50067508	A	G	rs10412446	0.761	0.753	0.937	1.05306	0.0093	2.61e-08	0	++++++-+-++-++-++-----++-+++++-+++++-+++++-+---+++++-++-+++-+-+++++--++++-++-+-++++-+-++++	12	89	0.1791	67390	94015	73173.9
50073226	NOSIP	rs7254718	19	50073226	50073226	A	G	rs7254718	0.761	0.752	0.949	1.05432	0.0092	1.066e-08	0	++++++++-++-++-++--+--++-+++++-+++++++++++-+---+++++-++++++-+-+++++--++++-++-+-++++-+-++++	11.3	89	0.1932	67390	94015	73173.9
50082587	NOSIP	rs67546213	19	50082587	50082587	G	A	rs67546213	0.853	0.842	0.931	1.06695	0.0112	7.287e-09	0	-+-----+--+-----+--+++--++----+---+---+-----+++----++---+-++-------++---++--+------+-+----	0	89	0.5194	67390	94015	73173.9
144905741	PUF60	rs55930529	8	144905741	144905741	C	T	rs55930529	0.557	0.534	0.881	1.05317	0.0088	3.554e-09	0	-+--+--+--+-----+---+---++-+??------+-++--+----+---+---+----++------+--++---+------------+	0	87	0.6512	65762	92149	71435.6
144908721	PUF60	rs11782759	8	144908721	144908721	C	G	rs11782759	0.533	0.509	0.912	1.05148	0.0087	7.323e-09	0	+-++-++-++-+++++-+++-+++-++-??++++++-+--++-++++-+++-+++-++++--++++++-++--+++-++++++++++++-	0	87	0.5794	65762	92149	71435.6
144912303	PUF60	rs13252406	8	144912303	144912303	T	C	rs13252406	0.532	0.508	0.919	1.05169	0.0087	6.185e-09	59	+-++-++-++-+++++-+++-+++-++-??+-++++-+--++-++++-+++-+++-++++--++++++-++--+++-++++++++++++-	0	87	0.5891	65762	92149	71435.6
198257795	SF3B1	SF3B1:NM_012433:exon24:c.A3657G:p.V1219V	2	198257795	198257795	T	C	rs4685	0.356	0.344	0.989	1.06364	0.0082	3.79e-14	18	++++-++-+-++-+++++++--++++-++++--+++-+-++++-+++++++-++++++++--+++++-++-+-+++++-+-+++++-+--	0	89	0.9572	67390	94015	73173.9
198258388	SF3B1	rs3115366	2	198258388	198258388	G	A	rs3115366	0.561	0.547	0.99	1.05327	0.0079	3.914e-11	0	-+-----+------------++----+-++++---+---+---+--++-------+----++-+++-+-++-------+-+-----+--+	0	89	0.5274	67390	94015	73173.9
198260098	SF3B1	rs2564389	2	198260098	198260098	A	T	rs2564389	0.356	0.344	0.993	1.06279	0.0081	7.152e-14	0	+-++-++-+-++-+++++++--++++-++++--+++-+-++++-+++++++-++++++++--+++++-++-+-+++++-+-+++++-+--	0	89	0.9562	67390	94015	73173.9
198261596	SF3B1	rs56718086	2	198261596	198261596	A	G	rs56718086	0.561	0.548	0.992	1.05327	0.0079	3.934e-11	0	+-+++++-++++++++++++--++++-+----+++-+++-+++-++--+++++++-++++--+-+-+-+--+++++++-+-+++++-+++	0	89	0.5401	67390	94015	73173.9
198265350	SF3B1	rs12621129	2	198265350	198265350	T	C	rs12621129	0.644	0.656	0.995	0.94139	0.0081	1.067e-13	20	-+--+--+-+--+-------++----+----++---+-+----+-------+--------++-----+--+-+-----+-+-----+-++	0	89	0.9521	67390	94015	73173.9
198265526	SF3B1	SF3B1:NM_012433:exon18:c.T2631C:p.G877G	2	198265526	198265526	A	G	rs788018	0.356	0.344	0.995	1.06279	0.0081	6.852e-14	20	+-++-++-+-++-+++++++--++++-++++--+++-+-++++-+++++++-++++++++--+++++-++-+-+++++-+-+++++-+--	0	89	0.9552	67390	94015	73173.9
198273591	SF3B1	rs12151726	2	198273591	198273591	C	T	rs12151726	0.588	0.576	0.988	1.04697	0.0079	6.475e-09	0	-+-----+------------++----+-++++---+---+---+---+-+-----+----++++-+-+-++-------+-+-----+-++	0	89	0.5633	67390	94015	73173.9
198274929	SF3B1	rs12151767	2	198274929	198274929	G	A	rs12151767	0.561	0.547	0.996	1.05285	0.0078	4.885e-11	77	-+-----+------------++----+-++++---+---+------++-------+----++-+-+-+-++-------+-+-----+---	0	89	0.5422	67390	94015	73173.9
198277498	SF3B1	rs35157131	2	198277498	198277498	T	C	rs35157131	0.357	0.344	0.996	1.06269	0.0081	6.764e-14	0	+-++-++-+-++-+++++++--+++++++++--+++-+-++++-+++++++-++++++++--+++++-++-+-+++++-+-+++++-+--	0	89	0.9404	67390	94015	73173.9
198277551	SF3B1	rs6710530	2	198277551	198277551	G	A	rs6710530	0.357	0.344	0.996	1.06269	0.0081	7.031e-14	0	-+--+--+-+--+-------++---------++---+-+----+-------+--------++-----+--+-+-----+-+-----+-++	0	89	0.9384	67390	94015	73173.9
198278571	SF3B1	rs55658871	2	198278571	198278571	G	A	rs55658871	0.561	0.547	0.995	1.05285	0.0078	4.727e-11	0	-+-----+------------++----+-++++---+---+------++-------+----++-+-+-+-++-------+-+-----+---	0	89	0.5376	67390	94015	73173.9
198278834	SF3B1	rs3097384	2	198278834	198278834	T	A	rs3097384	0.357	0.344	0.996	1.06269	0.0081	6.931e-14	0	-+--+--+-+--+-------++---------++---+-+----+-------+--------++-----+--+-+-----+-+-----+-++	0	89	0.9406	67390	94015	73173.9
198280586	SF3B1	rs788022	2	198280586	198280586	T	C	rs788022	0.357	0.344	0.996	1.06269	0.0081	6.768e-14	0	+-++-++-+-++-+++++++--+++++++++--+++-+-++++-+++++++-++++++++--+++++-++-+-+++++-+-+++++-+--	0	89	0.9388	67390	94015	73173.9
198281743	SF3B1	rs699318	2	198281743	198281743	T	C	rs699318	0.357	0.345	0.996	1.06279	0.0081	6.02e-14	0	+-++-++-+-++-+++++++--+++++++++--+++-+-++++-+++++++-+++-++++--+++++-++-+-+++++-+-+++++-+--	0	89	0.9434	67390	94015	73173.9
198281776	SF3B1	rs699319	2	198281776	198281776	C	A	rs699319	0.357	0.344	0.996	1.06279	0.0081	6.517e-14	1	-+--+--+-+--+-------++---------++---+-+----+-------+--------++-----+--+-+-----+-+-----+-++	0	89	0.9355	67390	94015	73173.9
198283305	SF3B1	SF3B1:NM_012433:exon5:c.A423G:p.K141K	2	198283305	198283305	T	C	rs788023	0.356	0.344	0.996	1.06258	0.0081	7.671e-14	22	+-++-++-+-++-+++++++--++++-++++--+++-+-++++-+++++++-++++++++--+++++-++-+-+++++-+-+++++-+--	0	89	0.9424	67390	94015	73173.9
198285554	SF3B1	rs2565161	2	198285554	198285554	C	G	rs2565161	0.356	0.344	0.996	1.06237	0.0081	9.398e-14	0	+-++-++-+-++-+++++++--++++-++++--+++-+-++++-+++++++-++++++++--+++++-++-+-+++++-+-+++++-+--	0	89	0.9417	67390	94015	73173.9
198286474	SF3B1	rs2565160	2	198286474	198286474	A	G	rs2565160	0.356	0.344	0.996	1.06269	0.0081	7.305e-14	0	+-++-++-+-++-+++++++--++++-++++--+++-+-++++-+++++++-++++++++--+++++-++-+-+++++-+-+++++-+--	0	89	0.9442	67390	94015	73173.9
198286581	SF3B1	rs2244271	2	198286581	198286581	C	T	rs2244271	0.356	0.344	0.996	1.06237	0.0081	9.39e-14	0	-+--+--+-+--+-------++----+----++---+-+----+-------+---+----++-----+--+-+-----+-+-----+-++	0	89	0.9517	67390	94015	73173.9
198293691	SF3B1	rs788021	2	198293691	198293691	T	C	rs788021	0.357	0.345	0.995	1.0629	0.0081	5.916e-14	0	+-++-++-+-++-+++++++--+++++++++--+++-+-++++-+++++++-++++++++--+++++-++-+-+++++-+-+++++-+--	0	89	0.9313	67390	94015	73173.9
19386015	SUGP1	rs8103496	19	19386015	19386015	A	G	rs8103496	0.659	0.669	0.986	0.95028	0.0082	4.646e-10	2	-+-+++-+-+-+----+-+-+-------+------++++-------++---++--++----+-----+-+-++---+--++-----+-+-	0	89	0.5378	67390	94015	73173.9
19387149	SUGP1	rs2017964	19	19387149	19387149	T	C	rs2017964	0.659	0.669	0.986	0.95028	0.0082	4.626e-10	1	-+-+++-+-+-+----+-+-+-------+------++++-------++---++--++----+-----+-+-++---+--++-----+-+-	0	89	0.5411	67390	94015	73173.9
19387356	SUGP1	rs2010506	19	19387356	19387356	C	T	rs2010506	0.83	0.841	1	0.93857	0.0116	4.257e-08	17	+?---??+-???++++-++++++++++?????++--+--++??+-++-+++-+++++++++-+++++-+?++--++-+----+++-++++	17.5	75	0.1015	53386	77258	58749.1
19387743	SUGP1	rs2074550	19	19387743	19387743	A	C	19:19387743_A_C	0.66	0.67	0.986	0.95009	0.0082	4.333e-10	3	-+-+++-+-+-+----+-+-+-------+------++++-------++---++--++----+-----+-+-++---+--++-----+---	0	89	0.5233	67390	94015	73173.9
19388057	SUGP1	rs2074551	19	19388057	19388057	G	C	rs2074551	0.711	0.721	0.892	0.95094	0.009	2.278e-08	5	+-+-+-+-+-+--+++-+++-+++++++-++++++----+++++++--++++-++--+++--+-+++++-+--++++++--++++-+--+	7.7	89	0.2765	67390	94015	73173.9
19390185	SUGP1	SUGP1:NM_172231:exon10:c.C1365T:p.Y455Y	19	19390185	19390185	G	A	rs11555053	0.829	0.841	1	0.93894	0.0115	4.784e-08	40	+?---??+-???++++-++++++++++?????++--+--++??+-++-+++-++++++++--+++++-+?++--++-+----+++-++++	12.9	75	0.1799	53386	77258	58749.1
19390497	SUGP1	rs8101938	19	19390497	19390497	G	A	rs8101938	0.659	0.67	0.987	0.95028	0.0082	4.575e-10	0	+-+---+-+-+-++++-+-+-+++++++-++++++----+++++++--+++--++--++++-+++++-+-+--+++-++--+++++-+-+	0	89	0.5345	67390	94015	73173.9
19390749	SUGP1	rs2301784	19	19390749	19390749	G	A	rs2301784	0.659	0.67	0.987	0.95028	0.0082	4.58e-10	1	+-+---+-+-+-++++-+-+-+++++++-++++++----+++++++--+++--++--++++-+++++-+-+--+++-++--+++++-+-+	0	89	0.5325	67390	94015	73173.9
19391402	SUGP1	rs6511026	19	19391402	19391402	C	T	rs6511026	0.659	0.67	0.987	0.95028	0.0082	4.709e-10	3	+-+---+-+-+-++++-+-+-+++++++-++++++----+++++++--+++--++--++++-+++++-+-+--+++-++--+++++-+-+	0	89	0.535	67390	94015	73173.9
19391851	SUGP1	rs6511027	19	19391851	19391851	C	T	rs6511027	0.859	0.865	0.999	0.9366	0.0113	6.99e-09	18	+------+-+++++++-+++++++++-++-+-++--+--+++++-++-+++-+++++++++-+++++-++++--++-++---+++-++++	16.5	89	0.09924	67390	94015	73173.9
19392401	SUGP1	rs2269873	19	19392401	19392401	T	C	rs2269873	0.659	0.67	0.988	0.95037	0.0082	4.847e-10	20	-+-+++-+-+-+----+-+-+-------+------++++-------++---++--++----+-----+-+-++---+--++-----+-+-	0	89	0.5347	67390	94015	73173.9
19394396	SUGP1	rs10407952	19	19394396	19394396	C	T	rs10407952	0.659	0.669	0.987	0.94961	0.0082	2.642e-10	0	+-++--+-+-+-++++-+-+-+++++++-++++++----+++++++0-+++--++--++++-+++++-+-+--++++++--+++++++-+	0	89	0.5355	67390	94015	73173.9
19394640	SUGP1	rs56212061	19	19394640	19394640	C	T	rs56212061	0.839	0.851	0.991	0.93239	0.0119	4.465e-09	0	+?+--??+-???++++-+++++++++-?????++--+--++??+-++-+++-++++++++--+++++-+?+---++-----++++-++++	19.8	75	0.07288	53386	77258	58749.1
19395967	SUGP1	rs6511028	19	19395967	19395967	T	C	rs6511028	0.659	0.67	0.988	0.94942	0.0082	2.214e-10	0	-+--++-+-+-+----+-+-+-------+------++++--------+---++--++----+-----+-+-++------++-------+-	0	89	0.5399	67390	94015	73173.9
19397479	SUGP1	rs7254748	19	19397479	19397479	A	C	rs7254748	0.659	0.67	0.988	0.94942	0.0082	2.256e-10	0	-+--++-+-+-+----+-+-+-------+------++++--------+---++--++----+-----+-+-++------++-------+-	0	89	0.54	67390	94015	73173.9
19398005	SUGP1	rs4808937	19	19398005	19398005	A	G	rs4808937	0.659	0.67	0.989	0.94952	0.0082	2.291e-10	0	-+--++-+-+-+----+-+-+-------+------++++--------+---++--++----+-----+-+-++------++-------+-	0	89	0.5391	67390	94015	73173.9
19401218	SUGP1	rs4808938	19	19401218	19401218	G	A	rs4808938	0.659	0.67	0.989	0.94952	0.0082	2.433e-10	0	+-++--+-+-+-++++-+-+-+++++++-++++++----++++++++-+++--++--++++-+++++-+-+--++++++--+++++++-+	0	89	0.5381	67390	94015	73173.9
19403410	SUGP1	rs10409234	19	19403410	19403410	A	G	rs10409234	0.659	0.67	0.99	0.94961	0.0082	2.542e-10	0	-+--++-+-+-+----+-+-+-------+------++++--------+---++--++----+-----+-+-++------++-------+-	0	89	0.5332	67390	94015	73173.9
19404786	SUGP1	rs7254927	19	19404786	19404786	C	G	rs7254927	0.659	0.67	0.991	0.94971	0.0082	2.622e-10	0	-+--++-+-+-+----+-+-+-------+------++++--------+---++--++----+-----+-+--+------++-------+-	0	89	0.5337	67390	94015	73173.9
19405405	SUGP1	rs2023882	19	19405405	19405405	T	C	rs2023882	0.659	0.67	0.991	0.94971	0.0082	2.778e-10	0	-+--++-+-+-+----+-+-+-------+------++++--------+---++--++----+-----+-+--+------++-------+-	0	89	0.5379	67390	94015	73173.9
19410480	SUGP1	rs4808939	19	19410480	19410480	C	T	rs4808939	0.665	0.675	0.99	0.95199	0.0082	2.02e-09	0	+-++--+-+-+-++++-+-+-+++++++-+-++++----++--++++-+++--++--++++-+++++-+-+--++++++--+++++++-+	4.3	89	0.3661	67390	94015	73173.9
19410622	SUGP1	rs4808193	19	19410622	19410622	T	C	rs4808193	0.66	0.671	0.99	0.9498	0.0082	3.11e-10	6	-+--++-+-+-+----+-+-+-------+------++++--------+---++--++----+-----+-+-++------++-------+-	0	89	0.5607	67390	94015	73173.9
19410948	SUGP1	rs4808940	19	19410948	19410948	C	G	rs4808940	0.66	0.671	0.99	0.9498	0.0082	3.008e-10	0	-+--++-+-+-+----+-+-+-------+------++++--------+---++--++----+-----+-+-++------++-------+-	0	89	0.5629	67390	94015	73173.9
19411136	SUGP1	rs4808941	19	19411136	19411136	T	C	rs4808941	0.66	0.671	0.99	0.9498	0.0082	3.14e-10	0	-+--++-+-+-+----+-+-+-------+------++++--------+---++--++----+-----+-+-++------++-------+-	0	89	0.5695	67390	94015	73173.9
19413381	SUGP1	rs2315022	19	19413381	19413381	A	G	rs2315022	0.659	0.67	0.992	0.94971	0.0082	2.626e-10	0	-+--++-+-+-+----+-+-+-------+------++++--------+---++--++----+-----+-+--+------++-------+-	0	89	0.5312	67390	94015	73173.9
19413947	SUGP1	rs2301786	19	19413947	19413947	A	G	rs2301786	0.659	0.67	0.992	0.94971	0.0082	2.636e-10	0	-+--++-+-+-+----+-+-+-------+------++++--------+---++--++----+-----+-+--+------++-------+-	0	89	0.5313	67390	94015	73173.9
19416045	SUGP1	rs1010207	19	19416045	19416045	T	C	rs1010207	0.659	0.67	0.992	0.94971	0.0082	2.577e-10	0	-+--++-+-+-+----+-+-+-------+------++++--------+---++--++----+-----+-+--+------++-------+-	0	89	0.5344	67390	94015	73173.9
19420581	SUGP1	rs4808942	19	19420581	19420581	C	T	rs4808942	0.659	0.67	0.993	0.94961	0.0082	2.326e-10	0	+-++--+-+-+-++++-+-+-+++++++-++++++----++++++++-+++--++--++++-+++++-+-++-++++++--+++++++-+	0	89	0.528	67390	94015	73173.9
19422485	SUGP1	rs2285859	19	19422485	19422485	A	G	rs2285859	0.658	0.669	0.993	0.94952	0.0082	2.14e-10	0	-+--++-+-+-+----+-+-+-------+------++++--------+---++--++----+-----+-+--+------++-------+-	0	89	0.5186	67390	94015	73173.9
19423817	SUGP1	rs2315024	19	19423817	19423817	T	A	rs2315024	0.666	0.676	0.991	0.95199	0.0082	2.076e-09	0	+-++--+-+-+-++++-+-+-+++++++-+-++++----++--++++-+++--++--++++-+++++-+-++-++++++--+++++++++	6.9	89	0.2971	67390	94015	73173.9
19426609	SUGP1	rs2315025	19	19426609	19426609	C	T	rs2315025	0.659	0.67	0.993	0.94942	0.0082	1.96e-10	0	+-++--+-+-+-++++-+-+-+++++++-++++++----++++++++-+++--++--++++-+++++-+-+--++++++--+++++++-+	0	89	0.5127	67390	94015	73173.9
19429975	SUGP1	rs12977937	19	19429975	19429975	C	G	rs12977937	0.659	0.67	0.995	0.94961	0.0081	2.309e-10	0	-+--++-+-+-+----+-+-+-------+------++++--------+---++--++----+-----+-+--+------++-------+-	0	89	0.5144	67390	94015	73173.9
77748972	TXNL4A	rs72970145	18	77748972	77748972	C	T	rs72970145	0.825	0.82	0.976	1.05834	0.0102	2.789e-08	0	-+++-+-----++---+----++++--------+-----++-------+------+--++-----+--+--------+--+-+--++-+-	0	89	0.764	67390	94015	73173.9
